# Supplementary material for: Vibration–rotation-tunneling states of the benzene dimer: an ab initio study
Source: Royal Society of Chemistry journal article supplement (doi:10.1039/c002653k), 2010-01-01
Supplement: c002653k.pdf [file c002653k.pdf]

**Supplementary information for: Vibration-rotation-tunneling states of the benzene dimer: an *ab initio* study**

Ad van der Avoird, Rafał Podeszwa, Krzysztof Szalewicz, Claude Leforestier, Rob van Harrevelt, Philip R. Bunker, Melanie Schnell, Gert von Helden, and Gerard Meijer

The geometry definition below (consistent with that of JPCA, 110, 10345 (2006)) differs from the one used in the present paper by the interchange of the monomer x and y axes. This amounts to adding 90 degrees to the Euler angles \gamma\_A and \gamma\_B.

# ----- Fit parameters -----

The following parameters are not changed from pot1 of JPCA, 110, 10345 (2006):

1. Cartesian coordinates of the benzene molecule and off-atomic sites (in Angstrom)

| Site | X                  | Y                  | Z   |
|------|--------------------|--------------------|-----|
| C1   | 0.000000000000000  | 1.396500000000000  | 0.0 |
| C2   | -1.209404476384990 | 0.698250000000000  | 0.0 |
| C3   | -1.209404476384990 | -0.698250000000000 | 0.0 |
| C4   | 0.000000000000000  | -1.396500000000000 | 0.0 |
| C5   | 1.209404476384990  | -0.698250000000000 | 0.0 |
| C6   | 1.209404476384990  | 0.698250000000000  | 0.0 |
| H1   | 0.000000000000000  | 2.481500000000000  | 0.0 |
| H2   | -2.149042039491110 | 1.240750000000000  | 0.0 |
| H3   | -2.149042039491110 | -1.240750000000000 | 0.0 |
| H4   | 0.000000000000000  | -2.481500000000000 | 0.0 |
| H5   | 2.149042039491110  | -1.240750000000000 | 0.0 |
| H6   | 2.149042039491110  | 1.240750000000000  | 0.0 |
| D1   | 0.000000000000000  | 1.794554300727060  | 0.0 |
| D2   | -1.554129613367140 | 0.897277150363530  | 0.0 |
| D3   | -1.554129613367140 | -0.897277150363530 | 0.0 |
| D4   | 0.000000000000000  | -1.794554300727060 | 0.0 |
| D5   | 1.554129613367140  | -0.897277150363530 | 0.0 |
| D6   | 1.554129613367140  | 0.897277150363530  | 0.0 |
| P1   | -0.725642684858874 | 1.256850000663900  | 0.0 |
| P2   | -1.451285369717750 | 0.000000000000000  | 0.0 |
| P3   | -0.725642684858874 | -1.256850000663900 | 0.0 |
| P4   | 0.725642684858874  | -1.256850000663900 | 0.0 |
| P5   | 1.451285369717750  | 0.000000000000000  | 0.0 |
| P6   | 0.725642684858874  | 1.256850000663900  | 0.0 |
| M    | 0.000000000000000  | 0.000000000000000  | 0.0 |

2. Site charges q (in atomic units)

| Site | q            |
|------|--------------|
| C    | -0.193357181 |
| H    | 0.278869361  |
| D    | -0.522242923 |
| P    | 0.436730743  |
| M    | 0.0          |

3. Asymptotic constants C\_6, C\_10, C\_12

Unit of C\_n: kcal/mol \* (Angstrom)^n

| ab | C_6             | C_8             | C_10            |
|----|-----------------|-----------------|-----------------|
| CC | 1.65682607E+03  | -3.04924411E+04 | 3.02203727E+05  |
| CH | -7.78366044E+02 | 1.76849531E+04  | -1.31856847E+05 |
| HH | 5.60668174E+02  | -1.26112754E+04 | 8.13927374E+04  |

Below we list only the parameters that are different from pot1 of JPCA, 110, 10345 (2006):

----- pot2 begin -----

Parameters of the exponential term

Units: beta 1/Angstrom  
exp(alpha) kcal/mol  
a\_1 1/Angstrom  
a\_2 1/Angstrom^2

| ab | beta           | alpha          | a_1             | a_2             |
|----|----------------|----------------|-----------------|-----------------|
| CC | 3.56852953E+00 | 1.42549400E+01 | -8.58978323E-01 | 2.28965059E-01  |
| CH | 4.32106867E+00 | 1.14351275E+01 | -1.14008352E+00 | 3.78455883E-01  |
| HH | 2.36344832E+00 | 6.66101313E+00 | -3.16919968E-01 | 1.93176364E-01  |
| CD | 2.48467609E+00 | 9.93096967E+00 | -5.15870900E-01 | 8.28940494E-06  |
| HD | 2.02913482E+00 | 1.55504520E-08 | -2.75419047E+02 | 1.39225237E+01  |
| DD | 2.81842319E+00 | 9.87920782E+00 | -1.25466713E+00 | 4.98737888E-01  |
| CP | 2.51163386E+00 | 1.07784199E+01 | -7.88772336E-01 | 1.49046241E-01  |
| HP | 1.77640258E+00 | 2.06533477E-09 | 4.81618704E+01  | 1.58003320E+01  |
| DP | 2.71818560E+00 | 2.54558471E+00 | -2.55426641E+02 | 7.29726701E+01  |
| PP | 2.00257219E+00 | 3.38080686E-02 | 1.37516171E+03  | -5.42734570E+02 |
| CM | 2.19575417E+00 | 9.98095561E+00 | -8.77101928E-01 | 1.06765442E-01  |
| HM | 2.41066829E+00 | 4.68076322E+00 | -4.62747777E+00 | -2.76092004E-01 |
| DM | 2.62545827E+00 | 1.03519024E+01 | -1.03903878E+00 | 3.49580177E-01  |
| PM | 3.79992577E+00 | 1.51432340E+01 | -7.53893273E-01 | 1.54411151E-01  |
| MM | 1.45787659E+00 | 8.33045333E+00 | -3.45021639E-02 | -2.56539253E-02 |

Damping parameters (in 1/Angstrom)

| ab    | delta1 | delta6 | delta8 | delta10 |
|-------|--------|--------|--------|---------|
| ----- | -----  | -----  | -----  | -----   |

```

CC 18.663053000 4.16877500 1.05840640 7.47648064
CH 1.786020630 3.29890314 2.22081722 1.33762128
HH 1.340746170 2.66006720 1.57962426 2.89892649
CD 1.146180580
HD 1.202172490
DD 1.202645810
CP 1.072787920
HP 1.051286110
DP 1.007863240
PP 0.949040398

```

#----- pot2 end -----

#----- pot3 begin -----

Parameters of the exponential term

```

Units: beta      1/Angstrom
      exp(alpha)  kcal/mol
      a_1         1/Angstrom
      a_2         1/Angstrom^2

```

| ab | beta           | alpha          | a_1             | a_2             |
|----|----------------|----------------|-----------------|-----------------|
| CC | 3.60378961E+00 | 1.43264870E+01 | -9.04405445E-01 | 2.43760520E-01  |
| CH | 4.10403506E+00 | 9.94293052E+00 | -1.43432939E+00 | 5.29072306E-01  |
| HH | 2.16694450E+00 | 6.62625341E+00 | -3.59376992E-01 | 1.60204673E-01  |
| CD | 2.63881856E+00 | 1.05467481E+01 | -4.87027626E-01 | -3.87240175E-04 |
| HD | 1.87784424E+00 | 2.00183627E+00 | -3.65253802E+01 | 2.20603874E+00  |
| DD | 2.77522924E+00 | 8.96220775E+00 | -2.09279617E+00 | 1.09578069E+00  |
| CP | 2.54791816E+00 | 1.06271525E+01 | -7.80487851E-01 | 1.41233025E-01  |
| HP | 1.59688943E+00 | 1.50035229E-09 | 7.65405713E+01  | -1.04085767E+00 |
| DP | 2.54560361E+00 | 2.63504496E-05 | -2.01303748E+03 | 3.74081129E+02  |
| PP | 1.93941130E+00 | 1.11048440E-04 | 1.19004006E+03  | -4.22675632E+02 |
| CM | 2.20162936E+00 | 1.00597948E+01 | -8.77418308E-01 | 1.10224705E-01  |
| HM | 2.04864769E+00 | 1.57406718E-03 | -3.16797038E+02 | 4.07717125E-01  |
| DM | 2.62466570E+00 | 1.03564632E+01 | -1.09712124E+00 | 3.83785143E-01  |
| PM | 3.81872124E+00 | 1.48705037E+01 | -7.47657445E-01 | 1.54846000E-01  |
| MM | 1.44959912E+00 | 8.35709667E+00 | -4.33560069E-02 | -1.91996193E-02 |

Damping parameters (in 1/Angstrom)

| ab | delta1       | delta6     | delta8     | delta10    |
|----|--------------|------------|------------|------------|
| CC | 19.255681000 | 2.22142019 | 1.03087212 | 7.85356007 |
| CH | 1.961588570  | 3.69026169 | 1.92624728 | 0.07343285 |
| HH | 1.281376060  | 2.43288971 | 1.26179207 | 3.00421324 |
| CD | 1.139464400  |            |            |            |
| HD | 1.199509480  |            |            |            |
| DD | 1.202805750  |            |            |            |
| CP | 1.078882400  |            |            |            |
| HP | 1.054482000  |            |            |            |
| DP | 1.005422520  |            |            |            |
| PP | 0.948741111  |            |            |            |

#----- pot2 end -----

#----- Fit parameters end -----

#-----Points used for fitting begin-----

```

# SAPT(DFT) results used for the fitting
# Aug-cc-pVTZ MC+BS basis set with midbond, described in text, was used.
# All energies in kcal/mol
# Geometric parameters are described in JPCA, 110, 10345 (2006)
# and can be converted to Cartesian coordinates with programs
# available at http://www.physics.udel.edu/~szalewic/sapt/benzene
# SAPT(DFT) terms:
# elst --- electrostatics E^(1)_{elst}(KS)
# exch --- first-order exchange E^(1)_{exch}(KS)
# ind --- induction E^(2)_{ind}(CKS)
# ex-ind --- exchange-induction \tilde{E}^(2)_{ex-ind}(CKS)
# disp --- dispersion E^(2)_{disp}(CKS)
# ex-disp --- exchange-dispersion \tilde{E}^(2)_{ex-disp}(CKS)
# ind3 --- third-order induction E^(3)_{ind}(KS)
# ex-ind3 --- scaled third-order exchange-induction \tilde{E}^(3)_{ex-ind}(KS)
# exch(S2) --- first-order exchange is the S^2 approximation (used in the above scaling) E^(1)_{exch}(KS)(S^2)
# total2 --- elst + exch + ind + ex-ind + disp + ex-disp
# total3 --- total2 + ind3 + ex-ind3

```

```

# The following geometries and energies (after correcting minor error in unit conversion)
# are taken from JPCA, 110, 10345 (2006). Third-order energies are calculated in this work.
# The points are used in fitting of both 'pot2' and 'pot3'

```

| #        | R        | beta_A   | gamma_A  | alpha_B   | beta_B    | gamma_B  | total3   | elst     | exch     | ind      | ex-ind   | disp     | ex-disp | total2   | ind3     | ex-ind3 | exch(S2) |
|----------|----------|----------|----------|-----------|-----------|----------|----------|----------|----------|----------|----------|----------|---------|----------|----------|---------|----------|
| 3.250000 | 0.000000 | 0.000000 | 0.000000 | 0.000000  | 0.000000  | 0.000000 | 1.4098   | -5.0587  | 18.8535  | -7.8525  | 7.5711   | -14.4227 | 2.2026  | 1.2933   | -16.1366 | 16.2531 | 18.7780  |
| 3.600000 | 0.000000 | 0.000000 | 0.000000 | 0.000000  | 0.000000  | 0.000000 | -1.5173  | -0.8872  | 6.7804   | -2.4957  | 2.2450   | -8.1500  | 0.9015  | -1.6059  | -4.8571  | 4.9457  | 6.7824   |
| 3.848457 | 0.000000 | 0.000000 | 0.000000 | 0.000000  | 0.000000  | 0.000000 | -1.7808  | 0.1577   | 3.2676   | -1.1537  | 0.9447   | -5.5225  | 0.4658  | -1.9405  | -2.0966  | 2.1563  | 3.2712   |
| 4.600000 | 0.000000 | 0.000000 | 0.000000 | 0.000000  | 0.000000  | 0.000000 | -0.8789  | 0.6586   | 0.3480   | -0.1552  | 0.0682   | -1.8723  | 0.0579  | -0.8948  | -0.1661  | 0.1820  | 0.3478   |
| 5.100000 | 0.000000 | 0.000000 | 0.000000 | 0.000000  | 0.000000  | 0.000000 | -0.4091  | 0.5311   | 0.0747   | -0.0551  | 0.0104   | -0.9910  | 0.0138  | -0.4162  | -0.0227  | 0.0298  | 0.0747   |
| 3.300000 | 0.000000 | 0.000000 | 0.000000 | 0.000000  | 30.000000 | 0.000000 | 8.9955   | -15.1047 | 43.2286  | -22.1723 | 20.8324  | -21.3235 | 4.0763  | 9.5367   | -45.9859 | 45.4447 | 42.1990  |
| 4.000000 | 0.000000 | 0.000000 | 0.000000 | 0.000000  | 30.000000 | 0.000000 | -1.4939  | -1.0112  | 5.6030   | -2.2902  | 2.0448   | -6.6674  | 0.7443  | -1.5769  | -4.4546  | 4.5375  | 5.5845   |
| 5.500000 | 0.000000 | 0.000000 | 0.000000 | 0.000000  | 30.000000 | 0.000000 | -0.4290  | 0.3502   | 0.0603   | -0.0479  | 0.0112   | -0.8189  | 0.0121  | -0.4330  | -0.0290  | 0.0329  | 0.0604   |
| 3.300000 | 0.000000 | 0.000000 | 0.000000 | 0.000000  | 30.000000 | 8.6091   | -15.0046 | 42.6979  | -22.1660 | 20.7814  | -21.1828 | 4.0406   | 9.1665  | -46.1044 | 45.5471  | 41.5598 |          |
| 3.600000 | 0.000000 | 0.000000 | 0.000000 | 0.000000  | 30.000000 | 1.4402   | -5.5131  | 18.0778  | -8.3429  | 7.8864   | -12.7799 | 2.0240   | 1.3523  | -16.9821 | 17.0701  | 17.8579 |          |
| 4.000000 | 0.000000 | 0.000000 | 0.000000 | 0.000000  | 30.000000 | -1.4634  | -1.0338  | 5.6465   | -2.3144  | 2.0694   | -6.6627  | 0.7477   | -1.5473 | -4.5024  | 4.5862   | 5.6255  |          |
| 5.500000 | 0.000000 | 0.000000 | 0.000000 | 0.000000  | 30.000000 | -0.4304  | 0.3488   | 0.0613   | -0.0481  | 0.0113   | -0.8198  | 0.0123   | -0.4343 | -0.0291  | 0.0330   | 0.0615  |          |
| 4.000000 | 0.000000 | 0.000000 | 0.000000 | 0.000000  | 60.000000 | 6.2547   | -10.1729 | 30.3411  | -11.1117 | 10.0289  | -15.4249 | 2.6270   | 6.2875  | -19.2055 | 19.1727  | 29.9248 |          |
| 5.000000 | 0.000000 | 0.000000 | 0.000000 | 0.000000  | 60.000000 | -1.9332  | -0.4514  | 1.4706   | -0.4433  | 0.2962   | -2.9997  | 0.1907   | -1.9370 | -0.6159  | 0.6197   | 1.4716  |          |
| 6.000000 | 0.000000 | 0.000000 | 0.000000 | 0.000000  | 60.000000 | -0.7371  | -0.0167  | 0.0634   | -0.0408  | 0.0079   | -0.7610  | 0.0106   | -0.7365 | -0.0210  | 0.0204   | 0.0635  |          |
| 4.000000 | 0.000000 | 0.000000 | 0.000000 | 0.000000  | 60.000000 | 7.7625   | -12.3366 | 36.3453  | -14.7760 | 12.4898  | -16.2880 | 2.8240   | 8.2584  | -25.0135 | 24.5176  | 35.2012 |          |
| 4.400000 | 0.000000 | 0.000000 | 0.000000 | 0.000000  | 60.000000 | -0.3725  | -3.7719  | 11.1832  | -3.8124  | 3.1980   | -8.2562  | 1.1053   | -0.3540 | -6.1652  | 6.1467   | 11.0670 |          |
| 5.000000 | 0.000000 | 0.000000 | 0.000000 | 0.000000  | 60.000000 | -1.9190  | -0.6202  | 1.8063   | -0.5591  | 0.3777   | -3.1449  | 0.2259   | -1.9143 | -0.7795  | 0.7748   | 1.8049  |          |
| 6.500000 | 0.000000 | 0.000000 | 0.000000 | 0.000000  | 60.000000 | -0.4535  | -0.0176  | 0.0154   | -0.0204  | 0.0017   | -0.4350  | 0.0030   | -0.4529 | -0.0052  | 0.0046   | 0.0155  |          |
| 4.300000 | 0.000000 | 0.000000 | 0.000000 | 90.000000 | 0.000000  | 5.1734   | -9.2061  | 27.3416  | -8.3482  | 7.2122   | -13.8522 | 2.2165   | 5.3638  | -12.9163 | 12.7259  | 27.0381 |          |

|          |           |            |            |           |             |         |          |         |          |         |          |        |         |          |         |         |
|----------|-----------|------------|------------|-----------|-------------|---------|----------|---------|----------|---------|----------|--------|---------|----------|---------|---------|
| 5.000000 | 0.000000  | 0.000000   | 0.000000   | 90.000000 | 0.000000    | -2.4342 | -1.4872  | 3.2198  | -0.7752  | 0.5585  | -4.2777  | 0.3519 | -2.4099 | -1.0243  | 1.0001  | 3.2212  |
| 7.000000 | 0.000000  | 0.000000   | 0.000000   | 90.000000 | 0.000000    | -0.4540 | -0.1389  | 0.0052  | -0.0115  | 0.0004  | -0.3092  | 0.0009 | -0.4531 | -0.0016  | 0.0008  | 0.0052  |
| 4.100000 | 0.000000  | 0.000000   | 0.000000   | 90.000000 | 30.000000   | 8.4381  | -14.5582 | 41.7594 | -16.4353 | 14.0001 | -19.0315 | 3.5072 | 9.2418  | -28.4671 | 27.6635 | 40.3040 |
| 5.100000 | 0.000000  | 0.000000   | 0.000000   | 90.000000 | 30.000000   | -2.6435 | -1.2974  | 2.3969  | -0.6768  | 0.4673  | -3.8121  | 0.3092 | -2.6128 | -0.9676  | 0.9369  | 2.3916  |
| 7.000000 | 0.000000  | 0.000000   | 0.000000   | 90.000000 | 30.000000   | -0.4859 | -0.1601  | 0.0055  | -0.0138  | 0.0005  | -0.3183  | 0.0012 | -0.4849 | -0.0024  | 0.0014  | 0.0055  |
| 3.250000 | 0.000000  | 0.000000   | 30.000000  | 30.000000 | 0.000000    | 10.2266 | -17.2376 | 48.2613 | -25.5335 | 23.9473 | -22.9295 | 4.4839 | 10.9899 | -53.4810 | 52.7116 | 46.9276 |
| 3.600000 | 0.000000  | 0.000000   | 30.000000  | 30.000000 | 0.000000    | 1.2667  | -5.3865  | 17.6966 | -8.1722  | 7.7407  | -12.7126 | 2.0049 | 1.1710  | -16.6876 | 16.7833 | 17.5017 |
| 4.000000 | 0.000000  | 0.000000   | 30.000000  | 30.000000 | 0.000000    | -1.5255 | -0.9935  | 5.5203  | -2.2712  | 2.0296  | -6.6335  | 0.7386 | -1.6097 | -4.4312  | 4.5154  | 5.5014  |
| 5.500000 | 0.000000  | 0.000000   | 30.000000  | 30.000000 | 0.000000    | -0.4292 | -0.3497  | 0.0601  | -0.0478  | 0.0112  | -0.8184  | 0.0121 | -0.4331 | -0.0289  | 0.0329  | 0.0620  |
| 3.300000 | 0.000000  | 0.000000   | 30.000000  | 30.000000 | 30.000000   | 9.1862  | -15.4522 | 44.1884 | -22.7426 | 21.2180 | -21.4758 | 4.1018 | 9.8378  | -46.9537 | 46.3022 | 43.0244 |
| 4.000000 | 0.000000  | 0.000000   | 30.000000  | 30.000000 | 30.000000   | -1.4309 | -1.0532  | 5.7354  | -2.3343  | 2.0845  | -6.6999  | 0.7539 | -1.5134 | -4.5235  | 4.6060  | 5.7146  |
| 5.500000 | 0.000000  | 0.000000   | 30.000000  | 30.000000 | 30.000000   | -0.4304 | -0.3492  | 0.0615  | -0.0481  | 0.0113  | -0.8205  | 0.0123 | -0.4343 | -0.0292  | 0.0331  | 0.0618  |
| 6.000000 | 0.000000  | 0.000000   | 30.000000  | 30.000000 | 30.000000   | -0.2052 | 0.2618   | 0.0128  | -0.0216  | 0.0020  | -0.4648  | 0.0030 | -0.2068 | -0.0044  | 0.0060  | 0.0129  |
| 4.000000 | 0.000000  | 0.000000   | 30.000000  | 60.000000 | 0.000000    | 6.3702  | -10.2045 | 30.5886 | -11.2491 | 10.1300 | -15.4741 | 2.6334 | 6.4242  | -19.3874 | 19.3334 | 30.1753 |
| 4.190000 | 0.000000  | 0.000000   | 30.000000  | 60.000000 | 0.000000    | 1.5592  | -5.7230  | 17.3815 | -5.8931  | 5.2568  | -11.1603 | 1.6627 | 1.5246  | -9.9596  | 9.9942  | 17.2571 |
| 5.000000 | 0.000000  | 0.000000   | 30.000000  | 60.000000 | 0.000000    | -1.9308 | -2.4508  | 1.4751  | -0.4445  | 0.2968  | -3.0021  | 0.1910 | -1.9345 | -0.6168  | 0.6204  | 1.4762  |
| 6.000000 | 0.000000  | 0.000000   | 30.000000  | 60.000000 | 0.000000    | -0.7368 | -0.0163  | 0.0635  | -0.0408  | 0.0079  | -0.7611  | 0.0106 | -0.7362 | -0.0209  | 0.0203  | 0.0636  |
| 4.000000 | 0.000000  | 0.000000   | 30.000000  | 60.000000 | 30.000000   | 7.8914  | -12.2211 | 36.6059 | -15.0697 | 12.6498 | -16.3420 | 2.8159 | 8.4388  | -25.3855 | 24.8381 | 35.4459 |
| 5.000000 | 0.000000  | 0.000000   | 30.000000  | 60.000000 | 30.000000   | -1.9177 | -0.6191  | 1.8095  | -0.5607  | 0.3785  | -3.1468  | 0.2260 | -1.9127 | -0.7810  | 0.7760  | 1.8080  |
| 6.000000 | 0.000000  | 0.000000   | 30.000000  | 60.000000 | 30.000000   | -0.7705 | -0.0401  | 0.0776  | -0.0466  | 0.0097  | -0.7829  | 0.0129 | -0.7693 | -0.0255  | 0.0243  | 0.0777  |
| 4.600000 | 0.000000  | 24.691700  | 354.691500 | 90.000000 | 120.000000  | -0.7923 | -4.0401  | 11.0101 | -2.9069  | 2.4249  | -8.2700  | 1.0423 | -0.7397 | -4.2867  | 4.2340  | 10.9719 |
| 5.650000 | 0.000000  | 24.691700  | 354.691500 | 90.000000 | 120.000000  | -1.6672 | -0.4562  | 0.4153  | -0.1191  | 0.0484  | -1.6016  | 0.0538 | -1.6594 | -0.1035  | 0.0957  | 0.4162  |
| 5.039048 | 0.000000  | 24.691701  | 354.691508 | 90.000000 | 120.000000  | -2.4438 | -1.3636  | 2.8455  | -0.6815  | 0.4814  | -4.0190  | 0.3157 | -2.4216 | -0.8884  | 0.8661  | 2.8476  |
| 6.350000 | 0.000000  | 24.691701  | 354.691508 | 90.000000 | 120.000000  | -0.8387 | -0.2209  | 0.0437  | -0.0285  | 0.0035  | -0.6406  | 0.0066 | -0.8364 | -0.0098  | 0.0074  | 0.0438  |
| 4.100000 | 9.303764  | 0.000000   | 90.000000  | 90.000000 | 40.514430   | 15.5827 | -21.1159 | 62.3203 | -28.6446 | 21.3348 | -21.6850 | 3.9995 | 18.0091 | -45.1804 | 42.7540 | 58.8669 |
| 4.974934 | 9.303764  | 0.000000   | 90.000000  | 90.000000 | 40.514430   | -1.9508 | -0.4610  | 5.2506  | -1.5098  | 1.1679  | -5.1045  | 0.5484 | -1.9053 | -2.2100  | 2.1646  | 5.2198  |
| 6.400000 | 9.303764  | 0.000000   | 90.000000  | 90.000000 | 40.514430   | -0.8662 | -0.2505  | 0.0650  | -0.0355  | 0.0064  | -0.6586  | 0.0098 | -0.8633 | -0.0171  | 0.0141  | 0.0651  |
| 4.100000 | 9.303764  | 0.000000   | 270.000000 | 90.000000 | 100.514430  | 8.6246  | -14.3600 | 41.0854 | -15.3112 | 13.3807 | -19.2477 | 3.5326 | 9.0797  | -26.3906 | 25.9355 | 40.0547 |
| 4.400000 | 9.303764  | 0.000000   | 270.000000 | 90.000000 | 100.514430  | -4.4094 | -6.4696  | 17.6776 | -5.7909  | 5.0277  | -11.7298 | 1.7805 | 0.4954  | -9.6633  | 9.5773  | 17.4704 |
| 4.974934 | 9.303764  | 0.000000   | 270.000000 | 90.000000 | 100.514430  | -2.7847 | -1.5850  | 3.2779  | -0.9247  | 0.6907  | -4.6316  | 0.4127 | -2.7600 | -1.3877  | 1.3630  | 3.2720  |
| 5.700000 | 9.303764  | 0.000000   | 270.000000 | 90.000000 | 100.514430  | -1.7034 | -0.4610  | 0.3555  | -0.1240  | 0.0508  | -1.5712  | 0.0547 | -1.6951 | -0.1214  | 0.1131  | 0.3557  |
| 6.400000 | 9.303764  | 0.000000   | 270.000000 | 90.000000 | 100.514430  | -0.8494 | -0.2332  | 0.0388  | -0.0310  | 0.0041  | -0.6326  | 0.0071 | -0.8468 | -0.0127  | 0.0101  | 0.0388  |
| 4.974934 | 9.303764  | 360.000000 | 90.000000  | 90.000000 | 40.514430   | -1.9507 | -2.2579  | 5.2506  | -1.5098  | 1.1679  | -5.1045  | 0.5484 | -1.9053 | -2.2100  | 2.1646  | 5.2198  |
| 4.400000 | 9.303764  | 0.000000   | 90.000000  | 90.000000 | 40.514440   | 4.7719  | -9.6512  | 27.5378 | -10.0807 | 8.3796  | -13.1733 | 2.1838 | 5.1970  | -16.2721 | 15.8469 | 26.7788 |
| 5.700000 | 9.303800  | 0.000000   | 90.000000  | 90.000000 | 40.514440   | -1.6767 | -0.5566  | 0.5817  | -0.1716  | 0.0840  | -1.6784  | 0.0751 | -1.6658 | -0.1794  | 0.1684  | 0.5821  |
| 3.150000 | 29.397393 | 270.000000 | 0.000000   | 29.397393 | 270.000000  | 5.7520  | -18.7808 | 48.8433 | -25.7860 | 24.6021 | -25.8548 | 5.1635 | 8.1873  | -55.0072 | 54.3429 | 48.0259 |
| 3.550000 | 29.397393 | 270.000000 | 0.000000   | 29.397393 | 270.000000  | -1.0991 | -5.7498  | 16.6940 | -7.8591  | 7.3620  | -13.7192 | 2.1411 | -1.1310 | -16.3824 | 16.4143 | 16.5962 |
| 4.016410 | 29.397393 | 270.000000 | 0.000000   | 29.397393 | 270.000000  | -2.6690 | -1.1112  | 4.6851  | -2.0390  | 1.7280  | -6.7045  | 0.7136 | -2.7279 | -4.0191  | 4.0781  | 4.6790  |
| 4.700000 | 29.397393 | 270.000000 | 0.000000   | 29.397393 | 270.000000  | -1.6306 | -0.1677  | 0.7045  | -0.3397  | 0.1984  | -2.5113  | 0.1293 | -1.6510 | -0.5174  | 0.5379  | 0.7046  |
| 5.500000 | 29.397400 | 270.000000 | 0.000000   | 29.397400 | 270.000000  | -0.6589 | 0.2011   | 0.0725  | -0.0634  | 0.0145  | -0.9045  | 0.0161 | -0.6638 | -0.0410  | 0.0459  | 0.0728  |
| 3.250000 | 30.000000 | 0.000000   | 0.000000   | 30.000000 | 0.000000    | 4.8301  | -15.0199 | 39.4508 | -20.3661 | 19.4119 | -22.5749 | 4.3318 | 5.2336  | -43.2624 | 42.8589 | 38.8924 |
| 3.600000 | 30.000000 | 0.000000   | 0.000000   | 30.000000 | 0.000000    | -1.2610 | -5.3207  | 15.5404 | -7.2828  | 6.7912  | -13.0170 | 2.0000 | -1.2888 | -15.1513 | 15.1791 | 15.4531 |
| 4.000000 | 30.000000 | 0.000000   | 0.000000   | 30.000000 | 0.000000    | -2.6102 | -1.3591  | 5.2847  | -2.3041  | 1.9791  | -7.0540  | 0.7847 | -2.6686 | -4.5756  | 4.6340  | 5.2751  |
| 5.500000 | 30.000000 | 0.000000   | 0.000000   | 30.000000 | 0.000000    | -0.6810 | 0.1890   | 0.0807  | -0.0662  | 0.0162  | -0.9230  | 0.0173 | -0.6859 | -0.0460  | 0.0509  | 0.0809  |
| 3.200000 | 30.000000 | 0.000000   | 0.000000   | 30.000000 | 30.000000   | 6.3337  | -17.2105 | 44.8376 | -23.4253 | 22.3354 | -24.4563 | 4.8113 | 6.8922  | -49.8788 | 49.3203 | 44.1431 |
| 4.100000 | 30.000000 | 0.000000   | 0.000000   | 30.000000 | 30.000000   | -2.6015 | -0.8801  | 3.9653  | -1.7213  | 1.4292  | -6.0600  | 0.6117 | -2.6552 | -3.3544  | 3.4080  | 3.9602  |
| 6.000000 | 30.000000 | 0.000000   | 0.000000   | 30.000000 | 30.000000   | -0.3855 | 0.1376   | 0.0186  | -0.0295  | 0.0031  | -0.5219  | 0.0046 | -0.3876 | -0.0083  | 0.0104  | 0.0187  |
| 4.000000 | 30.000000 | 0.000000   | 0.000000   | 60.000000 | 0.000000    | 4.6124  | -11.0211 | 29.6718 | -13.0973 | 12.2288 | -15.8110 | 2.8888 | 4.8599  | -26.2583 | 26.1008 | 29.2369 |
| 5.000000 | 30.000000 | 0.000000   | 0.000000   | 60.000000 | 0.000000    | -2.1027 | -0.8457  | 2.0238  | -0.7228  | 0.5661  | -3.4255  | 0.2812 | -2.1229 | -1.2743  | 1.2946  | 2.0216  |
| 6.500000 | 30.000000 | 0.000000   | 0.000000   | 60.000000 | 0.000000    | -0.5910 | -0.1109  | 0.0279  | -0.0229  | 0.0043  | -0.4952  | 0.0053 | -0.5914 | -0.0121  | 0.0125  | 0.0280  |
| 3.750000 | 30.000000 | 0.000000   | 0.000000   | 60.000000 | 30.000000   | 7.4663  | -18.4032 | 46.8273 | -23.7379 | 21.7975 | -22.3360 | 4.4858 | 8.6336  | -49.3441 | 48.1768 | 45.6243 |
| 4.050000 | 30.000000 | 0.000000   | 0.000000   | 60.000000 | 30.000000   | 0.7499  | -8.5654  | 21.9069 | -10.1973 | 9.4209  | -14.0574 | 2.4290 | 0.9366  | -20.8875 | 20.7008 | 21.5898 |
| 5.000000 | 30.000000 | 0.000000   | 0.000000   | 60.000000 | 30.000000   | -2.2423 | -0.8137  | 1.8305  | -0.7105  | 0.5478  | -3.3860  | 0.2732 | -2.2588 | -1.2729  | 1.2894  | 1.8275  |
| 6.500000 | 30.000000 | 0.000000   | 0.000000   | 60.000000 | 30.000000   | -0.6023 | -0.1194  | 0.0283  | -0.0245  | 0.0046  | -0.4971  | 0.0055 | -0.6026 | -0.0128  | 0.0131  | 0.0284  |
| 4.400000 | 30.000000 | 0.000000   | 0.000000   | 90.000000 | 0.000000    | 12.5949 | -16.3857 | 46.2439 | -17.9294 | 15.8605 | -18.1435 | 3.3971 | 13.0429 | -30.6880 | 30.2400 | 45.0640 |
| 5.500000 | 30.000000 | 0.000000   | 0.000000   | 90.000000 | 0.000000    | -1.9816 | -1.0384  | 1.9391  | -0.5348  | 0.4171  | -2.9930  | 0.2244 | -1.9856 | -0.7799  | 0.7938  | 1.9838  |
| 7.000000 | 30.000000 | 0.000000   | 0.000000   | 90.000000 | 0.000000    | -0.5330 | -0.1372  | 0.0201  | -0.0136  | 0.0025  | -0.4071  | 0.0031 | -0.5322 | -0.0064  | 0.0056  | 0.0201  |
| 4.550000 | 30.000000 | 0.000000   | 0.000000   | 90.000000 | 30.000000   | 9.3300  | -14.0796 | 39.3234 | -16.5213 | 13.8666 | -15.2182 | 2.7672 | 10.1382 | -28.0876 | 27.2794 | 37.6516 |
| 5.000000 | 30.000000 | 0.000000   | 0.000000   | 90.000000 | 30.000000</ |         |          |         |          |         |          |        |         |          |         |         |

|          |           |          |           |            |           |         |          |         |          |         |          |        |         |          |         |         |
|----------|-----------|----------|-----------|------------|-----------|---------|----------|---------|----------|---------|----------|--------|---------|----------|---------|---------|
| 4.900000 | 30.000000 | 0.000000 | 30.000000 | 150.000000 | 0.000000  | -0.9709 | 0.1520   | 1.7354  | -0.6461  | 0.5532  | -3.0469  | 0.2437 | -1.0087 | -1.2062  | 1.2440  | 1.7309  |
| 6.000000 | 30.000000 | 0.000000 | 30.000000 | 150.000000 | 0.000000  | -0.3066 | 0.3140   | 0.0652  | -0.0339  | 0.0132  | -0.6797  | 0.0118 | -0.3093 | -0.0325  | 0.0352  | 0.0653  |
| 4.000000 | 30.000000 | 0.000000 | 30.000000 | 150.000000 | 30.000000 | 8.3819  | -8.7468  | 29.8362 | -13.0269 | 12.0177 | -14.1272 | 2.5602 | 8.5132  | -25.1702 | 25.0390 | 29.1734 |
| 4.500000 | 30.000000 | 0.000000 | 30.000000 | 150.000000 | 30.000000 | 0.1168  | -1.1763  | 6.6200  | -2.4796  | 2.2857  | -5.9765  | 0.7531 | 0.0264  | -4.7236  | 4.8140  | 6.5812  |
| 5.000000 | 30.000000 | 0.000000 | 30.000000 | 150.000000 | 30.000000 | -0.8601 | 0.2316   | 1.4583  | -0.5118  | 0.4244  | -2.6913  | 0.1992 | -0.8896 | -0.9152  | 0.9446  | 1.4559  |
| 6.000000 | 30.000000 | 0.000000 | 30.000000 | 150.000000 | 30.000000 | -0.3056 | 0.3163   | 0.0704  | -0.0347  | 0.0137  | -0.6864  | 0.0123 | -0.3084 | -0.0333  | 0.0361  | 0.0705  |
| 3.400000 | 30.000000 | 0.000000 | 60.000000 | 30.000000  | 0.000000  | 8.8387  | -18.8684 | 50.2614 | -28.6857 | 26.1624 | -22.9226 | 4.5144 | 10.4614 | -60.5310 | 58.9082 | 48.3769 |
| 5.000000 | 30.000000 | 0.000000 | 60.000000 | 30.000000  | 0.000000  | -1.1661 | 0.2047   | 0.5739  | -0.2582  | 0.1599  | -1.9577  | 0.0958 | -1.1815 | -0.3961  | 0.4116  | 0.5739  |
| 6.000000 | 30.000000 | 0.000000 | 60.000000 | 30.000000  | 0.000000  | -0.3702 | 0.1795   | 0.0311  | -0.0310  | 0.0056  | -0.5639  | 0.0065 | -0.3723 | -0.0151  | 0.0171  | 0.0312  |
| 3.500000 | 30.000000 | 0.000000 | 60.000000 | 30.000000  | 30.000000 | 7.0392  | -14.3738 | 39.6187 | -21.1143 | 19.5590 | -19.6376 | 3.7338 | 7.7858  | -44.0083 | 43.2617 | 38.5144 |
| 5.000000 | 30.000000 | 0.000000 | 60.000000 | 30.000000  | 30.000000 | -1.1698 | 0.2058   | 0.5720  | -0.2510  | 0.1583  | -1.9599  | 0.0956 | -1.1852 | -0.3926  | 0.4081  | 0.5719  |
| 6.000000 | 30.000000 | 0.000000 | 60.000000 | 30.000000  | 30.000000 | -0.3709 | 0.1791   | 0.0309  | -0.0310  | 0.0055  | -0.5640  | 0.0065 | -0.3730 | -0.0149  | 0.0170  | 0.0311  |
| 4.200000 | 30.000000 | 0.000000 | 60.000000 | 60.000000  | 0.000000  | 7.6131  | -11.7109 | 33.7883 | -14.6776 | 13.0208 | -15.0932 | 2.6986 | 8.0261  | -26.8976 | 26.4846 | 32.7430 |
| 4.600000 | 30.000000 | 0.000000 | 60.000000 | 60.000000  | 0.000000  | 6.2148  | -3.6846  | 11.0127 | -4.6058  | 3.6279  | -7.7937  | 1.1010 | 0.2125  | -7.1923  | 7.2547  | 10.8890 |
| 5.100000 | 30.000000 | 0.000000 | 60.000000 | 60.000000  | 0.000000  | -1.6016 | -0.8578  | 2.5962  | -0.8521  | 0.6937  | -3.5232  | 0.3142 | -1.6291 | -1.4178  | 1.4453  | 2.5892  |
| 6.500000 | 30.000000 | 0.000000 | 60.000000 | 60.000000  | 0.000000  | -0.5581 | -0.0522  | 0.0395  | -0.0250  | 0.0059  | -0.5334  | 0.0067 | -0.5584 | -0.0156  | 0.0159  | 0.0395  |
| 4.150000 | 30.000000 | 0.000000 | 60.000000 | 60.000000  | 30.000000 | 7.1227  | -12.1054 | 34.0595 | -14.8254 | 13.2981 | -15.8793 | 2.9256 | 7.4730  | -27.9092 | 27.5589 | 33.2234 |
| 5.000000 | 30.000000 | 0.000000 | 60.000000 | 60.000000  | 30.000000 | -1.7596 | -1.1799  | 3.2825  | -1.1306  | 0.9316  | -4.0937  | 0.4052 | -1.7849 | -1.9404  | 1.9657  | 3.2724  |
| 6.500000 | 30.000000 | 0.000000 | 60.000000 | 60.000000  | 30.000000 | -0.5824 | -0.0724  | 0.0434  | -0.0274  | 0.0065  | -0.5401  | 0.0074 | -0.5826 | -0.0169  | 0.0170  | 0.0434  |
| 4.500000 | 30.000000 | 0.000000 | 60.000000 | 90.000000  | 0.000000  | 13.0966 | -15.0287 | 46.3624 | -18.7520 | 15.3236 | -16.8600 | 2.9519 | 13.9973 | -29.8357 | 28.9350 | 44.4353 |
| 6.000000 | 30.000000 | 0.000000 | 60.000000 | 90.000000  | 0.000000  | -1.3376 | -0.3691  | 0.4844  | -0.1383  | 0.0831  | -1.4576  | 0.0602 | -1.3373 | -0.1621  | 0.1617  | 0.4846  |
| 7.000000 | 30.000000 | 0.000000 | 60.000000 | 90.000000  | 0.000000  | -0.5167 | -0.1212  | 0.0212  | -0.0142  | 0.0025  | -0.4076  | 0.0032 | -0.5160 | -0.0064  | 0.0057  | 0.0212  |
| 4.500000 | 30.000000 | 0.000000 | 60.000000 | 90.000000  | 30.000000 | 11.6446 | -15.7903 | 45.4515 | -19.0474 | 15.8110 | -16.7755 | 3.0901 | 12.7394 | -32.3198 | 31.2249 | 43.4159 |
| 4.800000 | 30.000000 | 0.000000 | 60.000000 | 90.000000  | 30.000000 | 3.4076  | -7.4846  | 20.7127 | -7.5375  | 6.4293  | -10.2884 | 1.6846 | 3.5691  | -12.9927 | 12.1082 | 20.2462 |
| 5.500000 | 30.000000 | 0.000000 | 60.000000 | 90.000000  | 30.000000 | -1.6709 | -1.4055  | 2.9579  | -0.8475  | 0.6562  | -3.3399  | 0.3167 | -1.6620 | -1.2202  | 1.2113  | 2.9474  |
| 7.000000 | 30.000000 | 0.000000 | 60.000000 | 90.000000  | 30.000000 | -0.5694 | -0.1627  | 0.0342  | -0.0188  | 0.0040  | -0.4299  | 0.0049 | -0.5682 | -0.0096  | 0.0085  | 0.0343  |
| 4.400000 | 30.000000 | 0.000000 | 60.000000 | 120.000000 | 0.000000  | 8.6962  | -10.3788 | 32.4066 | -12.6195 | 11.2393 | -14.4580 | 2.5666 | 8.7564  | -21.9768 | 21.9167 | 31.5538 |
| 5.000000 | 30.000000 | 0.000000 | 60.000000 | 120.000000 | 0.000000  | -0.7924 | -1.4957  | 5.4551  | -1.7270  | 1.1514  | -5.1956  | 0.5889 | -0.8589 | -2.8682  | 2.9346  | 5.4271  |
| 5.500000 | 30.000000 | 0.000000 | 60.000000 | 120.000000 | 0.000000  | -1.2838 | -0.2107  | 1.1966  | -0.3613  | 0.2753  | -2.3499  | 0.1516 | -1.2984 | -0.5484  | 0.5631  | 1.1953  |
| 6.500000 | 30.000000 | 0.000000 | 60.000000 | 120.000000 | 0.000000  | -0.5011 | 0.0548   | 0.0554  | -0.0267  | 0.0086  | -0.6022  | 0.0088 | -0.5015 | -0.0206  | 0.0209  | 0.0554  |
| 4.500000 | 30.000000 | 0.000000 | 60.000000 | 120.000000 | 30.000000 | 9.4311  | -10.8058 | 34.3138 | -14.1067 | 11.8301 | -13.6627 | 2.3859 | 9.9545  | -23.4005 | 22.8771 | 33.1138 |
| 5.500000 | 30.000000 | 0.000000 | 60.000000 | 120.000000 | 30.000000 | -1.1464 | -0.4510  | 1.7905  | -0.5142  | 0.3940  | -2.5771  | 0.2028 | -1.1551 | -0.7536  | 0.7623  | 1.7869  |
| 6.500000 | 30.000000 | 0.000000 | 60.000000 | 120.000000 | 30.000000 | -0.5319 | 0.0276   | 0.0839  | -0.0329  | 0.0118  | -0.6344  | 0.0120 | -0.5319 | -0.0269  | 0.0268  | 0.0840  |
| 3.950000 | 30.000000 | 0.000000 | 60.000000 | 150.000000 | 0.000000  | 5.6040  | -7.6843  | 25.1249 | -11.5246 | 10.7435 | -13.3754 | 2.3617 | 5.6457  | -22.9244 | 22.8827 | 24.6173 |
| 4.900000 | 30.000000 | 0.000000 | 60.000000 | 150.000000 | 0.000000  | -1.0482 | 0.1481   | 1.5107  | -0.5702  | 0.4672  | -2.8504  | 0.2142 | -1.0803 | -1.0325  | 1.0646  | 1.5078  |
| 6.000000 | 30.000000 | 0.000000 | 60.000000 | 150.000000 | 0.000000  | -0.3268 | 0.2755   | 0.0562  | -0.0335  | 0.0110  | -0.6489  | 0.0104 | -0.3293 | -0.0279  | 0.0304  | 0.0563  |
| 4.000000 | 30.000000 | 0.000000 | 60.000000 | 150.000000 | 30.000000 | 4.3638  | -6.6869  | 21.8505 | -10.0152 | 9.3778  | -12.2670 | 2.1124 | 4.3716  | -20.0173 | 20.0095 | 21.4261 |
| 5.000000 | 30.000000 | 0.000000 | 60.000000 | 150.000000 | 30.000000 | -0.9863 | 0.2118   | 1.1727  | -0.4358  | 0.3454  | -2.4734  | 0.1681 | -1.0112 | -0.7688  | 0.7937  | 1.1709  |
| 6.000000 | 30.000000 | 0.000000 | 60.000000 | 150.000000 | 30.000000 | -0.3282 | 0.2742   | 0.0591  | -0.0338  | 0.0113  | -0.6521  | 0.0107 | -0.3307 | -0.0284  | 0.0309  | 0.0592  |
| 3.750000 | 30.000000 | 0.000000 | 90.000000 | 30.000000  | 0.000000  | 7.0657  | -10.9807 | 32.8238 | -16.2696 | 15.0003 | -16.0561 | 2.9458 | 7.4634  | -32.8474 | 32.4492 | 31.9227 |
| 4.000000 | 30.000000 | 0.000000 | 90.000000 | 30.000000  | 0.000000  | 1.9693  | -4.8183  | 16.0878 | -7.2734  | 6.7874  | -10.5501 | 1.6765 | 1.9097  | -14.5888 | 14.5684 | 15.8646 |
| 5.500000 | 30.000000 | 0.000000 | 90.000000 | 30.000000  | 0.000000  | -0.6508 | 0.2813   | 0.1972  | -0.0935  | 0.0453  | -1.1213  | 0.0338 | -0.6572 | -0.1136  | 0.1199  | 0.1974  |
| 6.000000 | 30.000000 | 0.000000 | 90.000000 | 30.000000  | 0.000000  | -0.3507 | 0.2259   | 0.0444  | -0.0324  | 0.0082  | -0.6075  | 0.0085 | -0.3529 | -0.0217  | 0.0239  | 0.0445  |
| 3.750000 | 30.000000 | 0.000000 | 90.000000 | 30.000000  | 30.000000 | 5.5190  | -10.0668 | 29.5996 | -15.0596 | 14.0587 | -15.6278 | 2.8597 | 5.7638  | -31.0538 | 30.8090 | 28.8728 |
| 4.700000 | 30.000000 | 0.000000 | 90.000000 | 30.000000  | 30.000000 | -1.3296 | -0.0752  | 1.9690  | -0.7991  | 0.6600  | -3.4073  | 0.2830 | -1.3697 | -1.4864  | 1.5265  | 1.9632  |
| 6.000000 | 30.000000 | 0.000000 | 90.000000 | 30.000000  | 30.000000 | -0.3521 | 0.2238   | 0.0437  | -0.0324  | 0.0082  | -0.6061  | 0.0085 | -0.3544 | -0.0216  | 0.0238  | 0.0438  |
| 4.400000 | 30.000000 | 0.000000 | 60.000000 | 60.000000  | 0.000000  | 8.3510  | -9.7143  | 31.0023 | -12.0311 | 10.3719 | -13.3848 | 2.2934 | 8.5373  | -19.9958 | 19.8095 | 30.1353 |
| 5.600000 | 30.000000 | 0.000000 | 90.000000 | 60.000000  | 0.000000  | -1.2273 | -0.1761  | 0.7996  | -0.2485  | 0.1701  | -1.8837  | 0.1029 | -1.2357 | -0.3505  | 0.3590  | 0.7992  |
| 7.000000 | 30.000000 | 0.000000 | 90.000000 | 60.000000  | 0.000000  | -0.3182 | 0.0040   | 0.0105  | -0.0111  | 0.0014  | -0.3249  | 0.0019 | -0.3182 | -0.0040  | 0.0040  | 0.0105  |
| 4.400000 | 30.000000 | 0.000000 | 90.000000 | 60.000000  | 30.000000 | 5.9106  | -9.3977  | 27.6164 | -11.3736 | 9.9771  | -12.9547 | 2.2593 | 6.1268  | -20.1398 | 19.9236 | 26.8797 |
| 5.500000 | 30.000000 | 0.000000 | 90.000000 | 60.000000  | 30.000000 | -1.3652 | -0.3853  | 1.2023  | -0.3751  | 0.2716  | -2.2365  | 0.1509 | -1.3721 | -0.5560  | 0.5629  | 1.2011  |
| 6.500000 | 30.000000 | 0.000000 | 90.000000 | 60.000000  | 30.000000 | -0.5607 | -0.0258  | 0.0615  | -0.0301  | 0.0089  | -0.5846  | 0.0095 | -0.5607 | -0.0216  | 0.0216  | 0.0615  |
| 4.600000 | 30.000000 | 0.000000 | 90.000000 | 90.000000  | 0.000000  | 8.6557  | -11.1510 | 33.5481 | -12.7378 | 10.8384 | -13.9841 | 2.4030 | 8.9165  | -20.5773 | 20.3165 | 32.4387 |
| 5.000000 | 30.000000 | 0.000000 | 90.000000 | 90.000000  | 0.000000  | 0.2251  | -3.5934  | 10.2920 | -3.2272  | 2.7904  | -7.0259  | 0.9374 | 0.1734  | -4.7970  | 5.0307  | 10.1763 |
| 5.500000 | 30.000000 | 0.000000 | 90.000000 | 90.000000  | 0.000000  | -1.6826 | -0.9771  | 2.2580  | -0.6210  | 0.4878  | -3.0911  | 0.2488 | -1.6946 | -0.8846  | 0.8966  | 2.2528  |
| 6.500000 | 30.000000 | 0.000000 | 90.000000 | 90.000000  | 0.000000  | -0.8335 | -0.1831  | 0.1017  | -0.0383  | 0.0141  | -0.7409  | 0.0141 | -0.8325 | -0.0310  | 0.0300  | 0.1017  |
| 4.600000 | 30.000000 | 0.000000 | 90.000000 | 90.000000  | 30.000000 | 8.1249  | -12.2155 | 34.7790 | -13.9057 | 11.6943 | -14.1782 | 2.5261 | 8.7000  | -23.2624 | 22.6873 | 33.5071 |
| 5.500000 | 30.000000 | 0.000000 | 90.000000 | 90.000000  | 30.000000 | -1.6679 | -1.3976  | 2.9460  | -0.8424  | 0.6509  | -3.3316  | 0.3156 | -1.6590 | -1.2116  | 1.2027  | 2.9354  |
| 7.000000 | 30.000000 | 0.000000 | 90.       |            |           |         |          |         |          |         |          |        |         |          |         |         |

|          |           |            |            |            |           |         |          |         |          |         |          |        |         |          |         |         |
|----------|-----------|------------|------------|------------|-----------|---------|----------|---------|----------|---------|----------|--------|---------|----------|---------|---------|
| 6.500000 | 30.000000 | 30.000000  | 30.000000  | 120.000000 | 0.000000  | -0.4782 | 0.0980   | 0.0662  | -0.0275  | 0.0100  | -0.6352  | 0.0100 | -0.4786 | -0.0229  | 0.0232  | 0.0663  |
| 4.600000 | 30.000000 | 30.000000  | 30.000000  | 120.000000 | 30.000000 | 9.6286  | -10.2247 | 33.1005 | -13.1958 | 11.0705 | -12.9548 | 2.2555 | 10.0513 | -21.4903 | 21.0677 | 31.8931 |
| 4.900000 | 30.000000 | 30.000000  | 30.000000  | 120.000000 | 30.000000 | 2.5761  | -4.0622  | 13.8133 | -4.7000  | 4.0482  | -7.6857  | 1.1488 | 2.5624  | -7.4179  | 7.4316  | 13.5816 |
| 5.600000 | 30.000000 | 30.000000  | 30.000000  | 120.000000 | 30.000000 | -0.9727 | -0.3278  | 1.6793  | -0.4593  | 0.3549  | -2.4149  | 0.1854 | -0.9825 | -0.6580  | 0.6677  | 1.6756  |
| 6.500000 | 30.000000 | 30.000000  | 30.000000  | 120.000000 | 30.000000 | -0.5041 | 0.0713   | 0.1037  | -0.0351  | 0.0144  | -0.6727  | 0.0142 | -0.5042 | -0.0310  | 0.0311  | 0.1038  |
| 4.000000 | 30.000000 | 30.000000  | 30.000000  | 150.000000 | 30.000000 | 6.2949  | -8.2863  | 26.7362 | -12.5088 | 11.6322 | -13.6099 | 2.4443 | 6.4077  | -24.9639 | 24.8541 | 26.0541 |
| 5.000000 | 30.000000 | 30.000000  | 30.000000  | 150.000000 | 30.000000 | -0.8741 | 0.2160   | 1.4406  | -0.5157  | 0.4307  | -2.6745  | 0.1989 | -0.9041 | -0.9313  | 0.9613  | 1.4376  |
| 6.000000 | 30.000000 | 30.000000  | 30.000000  | 150.000000 | 30.000000 | -0.3065 | 0.3136   | 0.0722  | -0.0350  | 0.0141  | -0.6866  | 0.0125 | -0.3093 | -0.0340  | 0.0369  | 0.0722  |
| 3.500000 | 30.000000 | 30.000000  | 60.000000  | 30.000000  | 30.000000 | 5.9994  | -13.4718 | 36.9032 | -19.8446 | 18.5396 | -19.2157 | 3.6401 | 6.5509  | -41.7965 | 41.2450 | 35.9404 |
| 4.700000 | 30.000000 | 30.000000  | 60.000000  | 30.000000  | 30.000000 | -1.5375 | 0.0316   | 1.3104  | -0.5638  | 0.4187  | -2.9699  | 0.2040 | -1.5670 | -0.9946  | 1.0241  | 1.3080  |
| 5.500000 | 30.000000 | 30.000000  | 60.000000  | 30.000000  | 30.000000 | -0.6739 | 0.2298   | 0.1321  | -0.0791  | 0.0291  | -1.0163  | 0.0269 | -0.6794 | -0.0779  | 0.0834  | 0.1324  |
| 4.250000 | 30.000000 | 30.000000  | 60.000000  | 60.000000  | 0.000000  | 5.6131  | -9.6491  | 28.0062 | -11.8665 | 10.6257 | -13.7328 | 2.3969 | 5.7803  | -21.7665 | 21.5993 | 27.3256 |
| 4.550000 | 30.000000 | 30.000000  | 60.000000  | 60.000000  | 0.000000  | 0.3621  | -4.0380  | 11.9251 | -4.5129  | 4.0574  | -8.3439  | 1.2097 | 0.2974  | -8.1379  | 8.2026  | 11.7916 |
| 5.000000 | 30.000000 | 30.000000  | 60.000000  | 60.000000  | 0.000000  | -1.6545 | -1.0946  | 3.3259  | -1.1081  | 0.9262  | -4.0613  | 0.3950 | -1.6888 | -1.9013  | 1.9356  | 3.2439  |
| 6.500000 | 30.000000 | 30.000000  | 60.000000  | 60.000000  | 0.000000  | -0.5602 | -0.0546  | 0.0382  | -0.0248  | 0.0059  | -0.5318  | 0.0066 | -0.5605 | -0.0155  | 0.0158  | 0.0383  |
| 4.100000 | 30.000000 | 30.000000  | 60.000000  | 60.000000  | 30.000000 | 7.6806  | -13.5794 | 37.3699 | -16.9850 | 15.1658 | -16.9460 | 3.1699 | 8.1953  | -32.3104 | 31.7957 | 36.2891 |
| 5.000000 | 30.000000 | 30.000000  | 60.000000  | 60.000000  | 30.000000 | -1.7875 | -1.1956  | 3.2552  | -1.1313  | 0.9321  | -4.0744  | 0.4032 | -1.8109 | -1.9489  | 1.9722  | 3.2453  |
| 6.000000 | 30.000000 | 30.000000  | 60.000000  | 60.000000  | 30.000000 | -0.9546 | -0.1347  | 0.1874  | -0.0778  | 0.0345  | -0.9942  | 0.0291 | -0.9557 | -0.0828  | 0.0839  | 0.1876  |
| 4.600000 | 30.000000 | 30.000000  | 60.000000  | 90.000000  | 0.000000  | 9.1101  | -11.5502 | 34.8930 | -13.2344 | 11.1389 | -14.1696 | 2.4194 | 9.4970  | -21.0439 | 20.6569 | 33.7501 |
| 5.600000 | 30.000000 | 30.000000  | 60.000000  | 90.000000  | 0.000000  | -1.6618 | -0.8234  | 1.7522  | -0.4701  | 0.3550  | -2.6753  | 0.1936 | -1.6679 | -0.6438  | 0.6498  | 1.7495  |
| 6.500000 | 30.000000 | 30.000000  | 60.000000  | 90.000000  | 0.000000  | -0.8421 | -0.1910  | 0.1069  | -0.0391  | 0.0146  | -0.7468  | 0.0145 | -0.8410 | -0.0317  | 0.0306  | 0.1070  |
| 4.550000 | 30.000000 | 30.000000  | 60.000000  | 90.000000  | 30.000000 | 9.8283  | -13.9971 | 40.1465 | -16.7048 | 13.9247 | -15.4774 | 2.8046 | 10.6964 | -28.1677 | 27.2996 | 38.4972 |
| 5.050000 | 30.000000 | 30.000000  | 60.000000  | 90.000000  | 30.000000 | 0.0754  | -4.0395  | 10.6087 | -3.5084  | 2.9589  | -6.8688  | 0.9657 | 0.1166  | -5.5103  | 5.4690  | 10.4714 |
| 5.700000 | 30.000000 | 30.000000  | 60.000000  | 90.000000  | 30.000000 | -1.6640 | -1.9381  | 1.6880  | -0.4730  | 0.3420  | -2.4653  | 0.1895 | -1.6567 | -1.9430  | 1.6376  | 1.6847  |
| 7.000000 | 30.000000 | 30.000000  | 60.000000  | 90.000000  | 30.000000 | -0.5699 | -0.1627  | 0.0349  | -0.0189  | 0.0040  | -0.4310  | 0.0050 | -0.5687 | -0.0097  | 0.0086  | 0.0349  |
| 4.600000 | 30.000000 | 30.000000  | 60.000000  | 120.000000 | 0.000000  | 6.2720  | -6.8402  | 23.4731 | -8.1659  | 7.0792  | -11.0755 | 1.7942 | 6.2649  | -12.9458 | 12.9529 | 22.9926 |
| 5.800000 | 30.000000 | 30.000000  | 60.000000  | 120.000000 | 0.000000  | -0.9977 | -0.0250  | 0.5668  | -0.1657  | 0.1082  | -1.5593  | 0.0720 | -1.0030 | -0.2181  | 0.2234  | 0.5670  |
| 6.500000 | 30.000000 | 30.000000  | 60.000000  | 120.000000 | 0.000000  | 0.4984  | 0.0593   | 0.0630  | -0.0278  | 0.0092  | -0.6118  | 0.0095 | -0.4987 | -0.0215  | 0.0218  | 0.0630  |
| 4.500000 | 30.000000 | 30.000000  | 60.000000  | 120.000000 | 30.000000 | 8.3197  | -10.1687 | 31.4862 | -12.6715 | 10.9261 | -13.3306 | 2.3643 | 8.6058  | -21.6540 | 21.3679 | 30.4946 |
| 5.000000 | 30.000000 | 30.000000  | 60.000000  | 120.000000 | 30.000000 | -0.0660 | -2.2227  | 7.3928  | -2.4074  | 2.0846  | -5.6851  | 0.7303 | -0.1075 | -3.9233  | 3.9647  | 7.3279  |
| 5.500000 | 30.000000 | 30.000000  | 60.000000  | 120.000000 | 30.000000 | -1.1859 | -0.4191  | 1.6818  | -0.4909  | 0.3800  | -2.5454  | 0.1966 | -1.1971 | -0.7354  | 0.7466  | 1.6783  |
| 3.900000 | 30.000000 | 30.000000  | 60.000000  | 150.000000 | 30.000000 | 6.7000  | -9.2237  | 28.9210 | -13.7342 | 12.8251 | -14.6034 | 2.6749 | 6.8598  | -27.7001 | 27.5404 | 28.2660 |
| 5.000000 | 30.000000 | 30.000000  | 60.000000  | 150.000000 | 30.000000 | -0.9995 | 0.2182   | 1.1504  | -0.4335  | 0.3436  | -2.4711  | 0.1676 | -1.0247 | -0.7682  | 0.7935  | 1.1484  |
| 6.000000 | 30.000000 | 30.000000  | 60.000000  | 150.000000 | 30.000000 | -0.3287 | 0.2738   | 0.0591  | -0.0339  | 0.0113  | -0.6523  | 0.0107 | -0.3312 | -0.0286  | 0.0312  | 0.0592  |
| 3.850000 | 30.000000 | 30.000000  | 90.000000  | 30.000000  | 30.000000 | 3.8863  | -7.6236  | 23.2748 | -11.2154 | 10.5328 | -13.3593 | 2.3320 | 3.9412  | -22.8888 | 22.8339 | 22.8409 |
| 5.000000 | 30.000000 | 30.000000  | 90.000000  | 30.000000  | 30.000000 | -1.1042 | 0.2023   | 0.8512  | -0.3417  | 0.2457  | -2.2123  | 0.1308 | -1.1240 | -0.5799  | 0.5936  | 0.8501  |
| 6.000000 | 30.000000 | 30.000000  | 90.000000  | 30.000000  | 30.000000 | -0.3537 | 0.2230   | 0.0449  | -0.0326  | 0.0082  | -0.6081  | 0.0086 | -0.3559 | -0.0217  | 0.0239  | 0.0449  |
| 4.400000 | 30.000000 | 30.000000  | 90.000000  | 60.000000  | 0.000000  | 5.8649  | -8.6699  | 26.1780 | -10.4633 | 9.3951  | -12.7038 | 2.1812 | 5.9173  | -18.6585 | 18.6062 | 25.5214 |
| 5.500000 | 30.000000 | 30.000000  | 90.000000  | 60.000000  | 0.000000  | -1.3247 | -0.2600  | 1.0382  | -0.3233  | 0.2369  | -2.1621  | 0.1335 | -1.3367 | -0.4780  | 0.4991  | 1.0373  |
| 6.500000 | 30.000000 | 30.000000  | 90.000000  | 60.000000  | 0.000000  | -0.5297 | 0.0011   | 0.0497  | -0.0263  | 0.0074  | -0.5700  | 0.0080 | -0.5301 | -0.0186  | 0.0189  | 0.0497  |
| 4.400000 | 30.000000 | 30.000000  | 90.000000  | 60.000000  | 30.000000 | 6.6632  | -9.5679  | 28.7834 | -11.6744 | 10.2281 | -13.2116 | 2.3225 | 6.8800  | -20.5405 | 20.3237 | 28.0696 |
| 5.500000 | 30.000000 | 30.000000  | 90.000000  | 60.000000  | 30.000000 | -1.3649 | -0.3801  | 1.2067  | -0.3742  | 0.2716  | -2.2484  | 0.1521 | -1.3724 | -0.5572  | 0.5646  | 1.2056  |
| 6.500000 | 30.000000 | 30.000000  | 90.000000  | 60.000000  | 30.000000 | -0.5612 | -0.0248  | 0.0612  | -0.0300  | 0.0089  | -0.5859  | 0.0095 | -0.5611 | -0.0217  | 0.0217  | 0.0613  |
| 4.600000 | 30.000000 | 30.000000  | 90.000000  | 90.000000  | 0.000000  | 12.3222 | -13.1766 | 42.3046 | -16.5906 | 13.2256 | -15.1339 | 2.5370 | 13.1660 | -25.0191 | 24.1752 | 40.5133 |
| 5.050000 | 30.000000 | 30.000000  | 90.000000  | 90.000000  | 0.000000  | 0.8124  | -3.6004  | 10.9214 | -3.3529  | 2.7885  | -6.8660  | 0.9096 | 0.8002  | -4.8077  | 4.8200  | 10.9778 |
| 5.600000 | 30.000000 | 30.000000  | 90.000000  | 90.000000  | 0.000000  | -1.5160 | -0.8294  | 1.9829  | -0.5244  | 0.3922  | -2.7518  | 0.2082 | -1.5223 | -0.6921  | 0.6983  | 1.7883  |
| 6.500000 | 30.000000 | 30.000000  | 90.000000  | 90.000000  | 0.000000  | -0.8285 | -0.1783  | 0.1154  | -0.0409  | 0.0153  | -0.7541  | 0.0152 | -0.8275 | -0.0325  | 0.0315  | 0.1155  |
| 4.600000 | 30.000000 | 30.000000  | 90.000000  | 90.000000  | 30.000000 | 8.8137  | -12.3486 | 36.0227 | -14.3645 | 12.0345 | -14.4833 | 2.5886 | 9.4494  | -23.8973 | 23.2617 | 34.7426 |
| 5.500000 | 30.000000 | 30.000000  | 90.000000  | 90.000000  | 30.000000 | -1.6319 | -1.3868  | 0.3012  | -0.8644  | 0.6671  | -3.3714  | 0.3207 | -1.6226 | -1.2396  | 1.2304  | 3.0006  |
| 6.500000 | 30.000000 | 30.000000  | 90.000000  | 90.000000  | 30.000000 | -0.9186 | -0.2640  | 0.1577  | -0.0544  | 0.0215  | -0.7977  | 0.0208 | -0.9160 | -0.0457  | 0.0431  | 0.1580  |
| 5.450000 | 58.926699 | 353.807950 | 260.921001 | 98.533032  | 47.987449 | -0.7004 | -2.8958  | 8.0204  | -2.1129  | 1.8190  | -6.3671  | 0.7699 | -0.7665 | -3.1363  | 3.2025  | 7.9822  |
| 5.872856 | 58.926699 | 353.807950 | 260.921007 | 98.533032  | 47.987449 | -1.7336 | -0.9960  | 2.3372  | -0.5626  | 0.4474  | -3.2370  | 0.2567 | -1.7542 | -0.7733  | 0.7939  | 2.3355  |
| 7.050000 | 58.926699 | 353.807950 | 260.921007 | 98.533032  | 47.987449 | -0.6686 | -0.1116  | 0.0659  | -0.0216  | 0.0081  | -0.6190  | 0.0091 | -0.6690 | -0.0159  | 0.0164  | 0.0660  |
| 6.550000 | 58.926700 | 353.808000 | 260.921000 | 98.533000  | 47.987400 | -1.1165 | -0.2408  | 0.3058  | -0.0769  | 0.0453  | -1.1911  | 0.0389 | -1.1188 | -0.0825  | 0.0849  | 0.3062  |
| 4.500000 | 60.000000 | 0.000000   | 0.000000   | 60.000000  | 0.000000  | 8.7223  | -15.1535 | 38.8983 | -17.8201 | 16.5804 | -16.7199 | 3.2859 | 9.0711  | -34.8704 | 34.5217 | 37.8701 |
| 5.500000 | 60.000000 | 0.000000   | 0.000000   | 60.000000  | 0.000000  | -1.9191 | -1.4271  | 2.7883  | -0.8699  | 0.7776  | -3.5650  | 0.3373 | -1.9588 | -1.5726  | 1.5524  | 2.7819  |
| 7.000000 | 60.000000 | 0.000000   | 0.000000   | 60.000000  | 0.000000  | -0.6278 | -0.1776  | 0.0357  | -0.0144  | 0.0057  | -0.4831  | 0.0057 | -0.6280 | -0.0126  | 0.0128  | 0.0357  |
| 4.500000 | 60.000000 | 0.000000   | 0.000000   | 60.000000  | 30.000000 | 7.9556  | -14.7763 | 37.6182 | -17.6908 | 16.4180 | -16.4177 | 3.2188 | 8.3701  | -34.9651 | 34.5506 | 36.52   |

|          |           |           |           |            |           |         |          |          |          |         |           |        |         |           |          |          |
|----------|-----------|-----------|-----------|------------|-----------|---------|----------|----------|----------|---------|-----------|--------|---------|-----------|----------|----------|
| 6.500000 | 60.000000 | 0.000000  | 60.000000 | 90.000000  | 30.000000 | -1.1226 | -0.3794  | 0.8377   | -0.1844  | 0.1269  | -1.6192   | 0.0911 | -1.1274 | -0.2109   | 0.2157   | 0.8377   |
| 7.300000 | 60.000000 | 0.000000  | 60.000000 | 90.000000  | 30.000000 | -0.5364 | -0.0661  | 0.0679   | -0.0185  | 0.0070  | -0.5357   | 0.0086 | -0.5368 | -0.0128   | 0.0132   | 0.0680   |
| 5.000000 | 60.000000 | 0.000000  | 60.000000 | 120.000000 | 0.000000  | 5.8441  | -6.9461  | 23.3462  | -7.1019  | 6.1989  | -11.6748  | 1.8641 | 5.6865  | -10.9312  | 11.0888  | 22.9476  |
| 6.000000 | 60.000000 | 0.000000  | 60.000000 | 120.000000 | 0.000000  | -1.1764 | -0.1491  | 1.1324   | -0.2744  | 0.2073  | -2.2412   | 0.1330 | -1.1921 | -0.3684   | 0.3841   | 1.1324   |
| 7.000000 | 60.000000 | 0.000000  | 60.000000 | 120.000000 | 0.000000  | -0.4486 | 0.0707   | 0.0479   | -0.0676  | 0.0063  | -0.5639   | 0.0071 | -0.4495 | -0.0130   | 0.0139   | 0.0480   |
| 5.400000 | 60.000000 | 0.000000  | 60.000000 | 120.000000 | 30.000000 | 5.8591  | -3.7501  | 17.3898  | -4.8693  | 3.7492  | -7.8091   | 1.1229 | 5.8333  | -5.5967   | 5.6226   | 17.0818  |
| 5.850000 | 60.000000 | 0.000000  | 60.000000 | 120.000000 | 30.000000 | 0.0600  | -0.6811  | 4.1130   | -0.9637  | 0.7283  | -3.5129   | 0.3472 | 0.0308  | -1.0867   | 1.1159   | 4.0977   |
| 6.400000 | 60.000000 | 0.000000  | 60.000000 | 120.000000 | 30.000000 | -0.7110 | 0.0241   | 0.6780   | -0.1487  | 0.0960  | -1.4370   | 0.0705 | -0.7171 | -0.1546   | 0.1607   | 0.6786   |
| 7.200000 | 60.000000 | 0.000000  | 60.000000 | 120.000000 | 30.000000 | -0.3561 | 0.0782   | 0.0485   | -0.0153  | 0.0051  | -0.4795   | 0.0062 | -0.3568 | -0.0095   | 0.0102   | 0.0486   |
| 5.100000 | 60.000000 | 0.000000  | 90.000000 | 60.000000  | 0.000000  | 7.6391  | -5.3150  | 22.8258  | -6.9277  | 5.4737  | -10.0120  | 1.5038 | 7.5486  | -8.6175   | 8.7080   | 22.3783  |
| 6.000000 | 60.000000 | 0.000000  | 90.000000 | 60.000000  | 0.000000  | -1.0864 | -0.2461  | 1.2663   | -0.3133  | 0.2233  | -2.1667   | 0.1354 | -1.1011 | -0.3779   | 0.3926   | 1.2665   |
| 7.000000 | 60.000000 | 0.000000  | 90.000000 | 60.000000  | 0.000000  | -0.5017 | -0.0054  | 0.0491   | -0.0194  | 0.0064  | -0.5401   | 0.0070 | -0.5023 | -0.0130   | 0.0137   | 0.0493   |
| 5.050000 | 60.000000 | 0.000000  | 90.000000 | 60.000000  | 30.000000 | 9.2673  | -8.8290  | 29.4126  | -9.6979  | 8.0240  | -11.4459  | 1.9082 | 9.3721  | -14.0318  | 13.9270  | 28.5207  |
| 5.350000 | 60.000000 | 0.000000  | 90.000000 | 60.000000  | 30.000000 | 2.4574  | -3.6238  | 12.4666  | -3.5559  | 2.9814  | -6.8483   | 0.9693 | 2.3892  | -4.9242   | 4.9924   | 12.2978  |
| 6.000000 | 60.000000 | 0.000000  | 90.000000 | 60.000000  | 30.000000 | -0.9828 | -0.4792  | 1.7487   | -0.4124  | 0.3129  | -2.3455   | 0.1770 | -0.9985 | -0.5224   | 0.5381   | 1.7469   |
| 6.900000 | 60.000000 | 0.000000  | 90.000000 | 60.000000  | 30.000000 | -0.5771 | -0.0302  | 0.1025   | -0.0289  | 0.0127  | -0.6471   | 0.0130 | -0.5781 | -0.0243   | 0.0252   | 0.1027   |
| 5.150000 | 60.000000 | 0.000000  | 90.000000 | 90.000000  | 0.000000  | 7.7243  | -8.7558  | 28.0000  | -8.2242  | 6.9291  | -12.3983  | 2.0103 | 7.5610  | -11.5804  | 11.7437  | 27.3917  |
| 5.370000 | 60.000000 | 0.000000  | 90.000000 | 90.000000  | 0.000000  | 2.3969  | -4.5989  | 14.7633  | -3.9236  | 3.3167  | -8.5050   | 1.1936 | 2.2460  | -5.3202   | 5.4770   | 14.5999  |
| 6.000000 | 60.000000 | 0.000000  | 90.000000 | 90.000000  | 0.000000  | -1.4075 | -0.8893  | 2.4620   | -0.4792  | 0.3669  | -2.9799   | 0.2223 | -1.4335 | -0.5805   | 0.6064   | 2.4599   |
| 7.000000 | 60.000000 | 0.000000  | 90.000000 | 90.000000  | 0.000000  | -0.6335 | -0.0694  | 0.0884   | -0.0258  | 0.0103  | -0.6997   | 0.0115 | -0.6847 | -0.0185   | 0.0196   | 0.0885   |
| 5.400000 | 60.000000 | 0.000000  | 90.000000 | 90.000000  | 30.000000 | 5.2018  | -7.3500  | 21.9669  | -7.1051  | 5.8562  | -9.6951   | 1.5851 | 5.2580  | -10.3744  | 10.3181  | 21.4371  |
| 6.000000 | 60.000000 | 0.000000  | 90.000000 | 90.000000  | 30.000000 | -0.9545 | -1.4504  | 3.8445   | -0.9399  | 0.7469  | -3.5414   | 0.3639 | -0.9764 | -1.2309   | 1.2528   | 3.8283   |
| 7.400000 | 60.000000 | 0.000000  | 90.000000 | 90.000000  | 30.000000 | -0.4929 | -0.0686  | 0.0496   | -0.0145  | 0.0048  | -0.4709   | 0.0064 | -0.4932 | -0.0091   | 0.0094   | 0.0496   |
| 4.000000 | 60.000000 | 30.000000 | 0.000000  | 60.000000  | 30.000000 | 16.6201 | -46.5294 | 115.7606 | -71.9982 | 58.9666 | -34.0236  | 7.1491 | 29.3250 | -151.2051 | 138.5001 | 106.4102 |
| 4.750000 | 60.000000 | 30.000000 | 0.000000  | 60.000000  | 30.000000 | 2.8992  | -8.5996  | 21.5360  | -9.4235  | 8.7605  | -11.2851  | 1.9844 | 2.9727  | -18.1182  | 18.0448  | 21.0565  |
| 5.500000 | 60.000000 | 30.000000 | 0.000000  | 60.000000  | 30.000000 | -1.7059 | -1.6455  | 3.3110   | -1.0667  | 0.9506  | -3.6738   | 0.3842 | -1.7402 | -1.8462   | 1.8805   | 3.2988   |
| 7.000000 | 60.000000 | 30.000000 | 0.000000  | 60.000000  | 30.000000 | -0.6569 | -0.2063  | 0.0514   | -0.0185  | 0.0076  | -0.4989   | 0.0076 | -0.6570 | -0.0160   | 0.0161   | 0.0515   |
| 5.100000 | 60.000000 | 30.000000 | 0.000000  | 90.000000  | 0.000000  | 8.8961  | -11.1477 | 33.1693  | -10.7801 | 9.3702  | -14.2051  | 2.4699 | 8.8766  | -16.8740  | 16.8935  | 32.3576  |
| 6.000000 | 60.000000 | 30.000000 | 0.000000  | 90.000000  | 0.000000  | -1.4087 | -0.8893  | 2.4847   | -0.5726  | 0.4698  | -3.1883   | 0.2603 | -1.4354 | -0.7685   | 0.7952   | 2.4801   |
| 7.000000 | 60.000000 | 30.000000 | 0.000000  | 90.000000  | 0.000000  | -0.6753 | -0.0454  | 0.1141   | -0.0280  | 0.0142  | -0.7459   | 0.0146 | -0.6764 | -0.0250   | 0.0261   | 0.1141   |
| 5.500000 | 60.000000 | 30.000000 | 0.000000  | 90.000000  | 30.000000 | 8.8406  | -8.6192  | 27.9262  | -8.7931  | 6.8716  | -9.9301   | 1.6264 | 9.0818  | -11.4549  | 11.2137  | 27.0105  |
| 6.500000 | 60.000000 | 30.000000 | 0.000000  | 90.000000  | 30.000000 | -0.8096 | -0.4878  | 1.5014   | -0.3062  | 0.2154  | -1.8742   | 0.1368 | -0.8147 | -0.3159   | 0.3210   | 1.5000   |
| 7.250000 | 60.000000 | 30.000000 | 0.000000  | 90.000000  | 30.000000 | -0.5332 | -0.0452  | 0.1403   | -0.0296  | 0.0138  | -0.6283   | 0.0152 | -0.5337 | -0.0217   | 0.0222   | 0.1404   |
| 6.050000 | 60.000000 | 30.000000 | 0.000000  | 120.000000 | 30.000000 | 1.3241  | -0.3213  | 4.9999   | -1.1337  | 0.7973  | -3.3977   | 0.3579 | 1.3025  | -1.0238   | 1.0454   | 4.9728   |
| 6.700000 | 60.000000 | 30.000000 | 0.000000  | 120.000000 | 30.000000 | -0.3281 | 0.2424   | 0.5627   | -0.1113  | 0.0657  | -1.1448   | 0.0529 | -0.3324 | -0.0916   | 0.0959   | 0.5630   |
| 7.700000 | 60.000000 | 30.000000 | 0.000000  | 120.000000 | 30.000000 | -0.1421 | 0.1436   | 0.0192   | -0.0067  | 0.0016  | -0.3025   | 0.0023 | -0.1425 | -0.0026   | 0.0030   | 0.0192   |
| 4.600000 | 60.000000 | 30.000000 | 30.000000 | 60.000000  | 30.000000 | 7.6774  | -13.8301 | 36.0021  | -16.4185 | 14.8636 | -15.2590  | 2.9045 | 8.2625  | -31.4204  | 30.8353  | 34.8414  |
| 4.900000 | 60.000000 | 30.000000 | 30.000000 | 60.000000  | 30.000000 | 2.0106  | -6.7935  | 17.3577  | -6.8936  | 6.3570  | -9.6390   | 1.6088 | 1.9973  | -12.7231  | 12.7364  | 17.0481  |
| 6.000000 | 60.000000 | 30.000000 | 30.000000 | 60.000000  | 30.000000 | -1.5013 | -0.6663  | 0.9583   | -0.2711  | 0.2128  | -1.8633   | 0.1198 | -1.5099 | -0.4106   | 0.4192   | 0.9583   |
| 7.000000 | 60.000000 | 30.000000 | 30.000000 | 60.000000  | 30.000000 | -0.6462 | -0.1888  | 0.0552   | -0.0192  | 0.0079  | -0.5095   | 0.0080 | -0.6464 | -0.0167   | 0.0168   | 0.0553   |
| 5.300000 | 60.000000 | 30.000000 | 30.000000 | 90.000000  | 0.000000  | 6.2839  | -7.5305  | 23.8903  | -7.0237  | 5.9169  | -10.7705  | 1.7104 | 6.1929  | -9.7844   | 9.8754   | 23.3736  |
| 5.500000 | 60.000000 | 30.000000 | 30.000000 | 90.000000  | 30.000000 | 8.7515  | -8.5699  | 27.7530  | -8.7570  | 6.8471  | -9.9202   | 1.6266 | 8.9796  | -11.4178  | 11.1897  | 26.8472  |
| 6.500000 | 60.000000 | 30.000000 | 30.000000 | 90.000000  | 30.000000 | -0.8203 | -0.4907  | 1.4902   | -0.3055  | 0.2139  | -1.8698   | 0.1362 | -0.8257 | -0.3145   | 0.3199   | 1.4888   |
| 7.200000 | 60.000000 | 30.000000 | 30.000000 | 90.000000  | 30.000000 | -0.5664 | -0.0604  | 0.1636   | -0.0343  | 0.0164  | -0.6700   | 0.0176 | -0.5670 | -0.0257   | 0.0263   | 0.1636   |
| 5.500000 | 60.000000 | 30.000000 | 30.000000 | 120.000000 | 30.000000 | 9.2273  | -4.2849  | 22.1935  | -6.3300  | 4.7348  | -8.2926   | 1.2406 | 9.2615  | -6.7618   | 6.7276   | 21.6320  |
| 6.500000 | 60.000000 | 30.000000 | 30.000000 | 120.000000 | 30.000000 | -0.4003 | 0.1363   | 0.9098   | -0.1825  | 0.1197  | -1.4758   | 0.0848 | -0.4076 | -0.1720   | 0.1793   | 0.9098   |
| 7.300000 | 60.000000 | 30.000000 | 30.000000 | 120.000000 | 30.000000 | -0.2596 | 0.1536   | 0.0643   | -0.0161  | 0.0060  | -0.4756   | 0.0074 | -0.2604 | -0.0098   | 0.0107   | 0.0644   |
| 4.850000 | 60.000000 | 30.000000 | 60.000000 | 60.000000  | 30.000000 | 6.6264  | -10.4012 | 28.7262  | -11.2067 | 9.9871  | -12.5714  | 2.2793 | 6.8134  | -19.7623  | 19.5753  | 28.0045  |
| 5.300000 | 60.000000 | 30.000000 | 60.000000 | 60.000000  | 30.000000 | -0.0839 | -3.3002  | 8.7060   | -2.7939  | 2.4961  | -6.0990   | 0.8474 | -0.1436 | -4.6664   | 4.7262   | 8.6290   |
| 6.000000 | 60.000000 | 30.000000 | 60.000000 | 60.000000  | 30.000000 | -1.3867 | -0.6455  | 1.2440   | -0.3285  | 0.2590  | -2.0736   | 0.1466 | -1.3981 | -0.4838   | 0.4952   | 1.2430   |
| 7.000000 | 60.000000 | 30.000000 | 60.000000 | 60.000000  | 30.000000 | -0.6112 | -0.1347  | 0.0666   | -0.0211  | 0.0088  | -0.5406   | 0.0093 | -0.6116 | -0.0184   | 0.0187   | 0.0667   |
| 5.500000 | 60.000000 | 30.000000 | 60.000000 | 90.000000  | 0.000000  | 8.0986  | -5.2600  | 22.7019  | -6.3873  | 4.7425  | -9.0039   | 1.3105 | 8.1037  | -6.6670   | 6.6619   | 22.1761  |
| 5.800000 | 60.000000 | 30.000000 | 60.000000 | 90.000000  | 0.000000  | 1.7407  | -2.0337  | 8.9212   | -2.1827  | 1.6276  | -5.2672   | 0.6299 | 1.6951  | -2.2004   | 2.2461   | 8.8396   |
| 6.500000 | 60.000000 | 30.000000 | 60.000000 | 90.000000  | 0.000000  | -0.8760 | -0.1848  | 0.9164   | -0.1913  | 0.1209  | -1.6314   | 0.0872 | -0.8831 | -0.1717   | 0.1788   | 0.9169   |
| 7.500000 | 60.000000 | 30.000000 | 60.000000 | 90.000000  | 0.000000  | -0.3892 | -0.0045  | 0.0325   | -0.0115  | 0.0029  | -0.4130   | 0.0040 | -0.3896 | -0.0050   | 0.0054   | 0.0325   |
| 5.500000 | 60.000000 | 30.000000 | 60.000000 | 90.000000  | 30.000000 | 8.6364  | -8.4264  | 27.4745  | -8.7025  | 6.8116  | -9.9570   | 1.6362 | 8.8365  | -11.3756  | 11.1756  | 26.9100  |
| 6.500000 | 60.000000 | 30.000000 | 60.000000 | 90.000000  | 30.000000 | -0.8355 | -0.4860  | 1.4687   | -0.3046  | 0.2110  | -1.8660   | 0.1352 | -0.8417 | -0.3114   | 0.3176   | 1.4674   |
| 7.400000 | 60.000000 | 30.000000 | 60.000000 | 90.000000  | 30.000000 | -0.4733 | -0.0423  | 0.0845   | -0.0203  | 0.0077  | -0.5129   | 0.0095 | -0.4738 | -0.0125   | 0.0130   | 0.0846   |
| 5.350000 | 60.000000 | 30.000000 | 60.000000 | 120.000000 | 30.000000 | 5.5866  | -5.1304  | 18.6268  | -5.5348  | 4.6813  | -8.4792</ |        |         |           |          |          |

|                                                                                                  |            |            |            |            |            |         |          |         |          |         |          |        |         |          |         |         |
|--------------------------------------------------------------------------------------------------|------------|------------|------------|------------|------------|---------|----------|---------|----------|---------|----------|--------|---------|----------|---------|---------|
| 6.700000                                                                                         | 90.000000  | 0.000000   | 270.000000 | 90.000000  | 60.000000  | -1.2047 | -0.2333  | 0.3947  | -0.0691  | 0.0388  | -1.3865  | 0.0454 | -1.2101 | -0.0578  | 0.0632  | 0.3949  |
| 7.400000                                                                                         | 90.000000  | 0.000000   | 270.000000 | 90.000000  | 60.000000  | -0.5492 | -0.0417  | 0.0404  | -0.0112  | 0.0027  | -0.5459  | 0.0053 | -0.5504 | -0.0040  | 0.0052  | 0.0404  |
| 6.400000                                                                                         | 90.000000  | 30.000000  | 0.000000   | 90.000000  | 30.000000  | 4.8248  | -0.8276  | 10.9611 | -2.8151  | 1.7333  | -4.7914  | 0.5884 | 4.8487  | -1.8788  | 1.8548  | 10.8231 |
| 7.500000                                                                                         | 90.000000  | 30.000000  | 0.000000   | 90.000000  | 30.000000  | -0.2613 | 0.2090   | 0.2600  | -0.0537  | 0.0213  | -0.7235  | 0.0233 | -0.2636 | -0.0243  | 0.0266  | 0.2603  |
| 8.300000                                                                                         | 90.000000  | 30.000000  | 0.000000   | 90.000000  | 30.000000  | -0.1258 | 0.1161   | 0.0160  | -0.0066  | 0.0009  | -0.2545  | 0.0017 | -0.1263 | -0.0010  | 0.0015  | 0.0161  |
| 6.400000                                                                                         | 90.000000  | 30.000000  | 30.000000  | 90.000000  | 30.000000  | 4.7517  | -0.9067  | 10.9559 | -2.8203  | 1.7357  | -4.7787  | 0.5886 | 4.7746  | -1.8806  | 1.8577  | 10.8177 |
| 6.900000                                                                                         | 90.000000  | 30.000000  | 30.000000  | 90.000000  | 30.000000  | 0.1830  | 0.0904   | 2.0278  | -0.4223  | 0.2356  | -1.9048  | 0.1490 | 0.1758  | -0.2528  | 0.2600  | 2.0247  |
| 7.500000                                                                                         | 90.000000  | 30.000000  | 30.000000  | 90.000000  | 30.000000  | -0.2878 | 0.1799   | 0.2599  | -0.0540  | 0.0214  | -0.7206  | 0.0233 | -0.2901 | -0.0244  | 0.0267  | 0.2602  |
| 8.100000                                                                                         | 90.000000  | 30.000000  | 30.000000  | 90.000000  | 30.000000  | -0.1748 | 0.1181   | 0.0323  | -0.0104  | 0.0020  | -0.3208  | 0.0033 | -0.1755 | -0.0023  | 0.0030  | 0.0324  |
| 6.350000                                                                                         | 90.000000  | 30.000000  | 60.000000  | 90.000000  | 30.000000  | 5.7332  | -1.2580  | 12.9229 | -3.4370  | 2.1148  | -5.2373  | 0.6655 | 5.7709  | -2.3049  | 2.2672  | 12.7278 |
| 7.500000                                                                                         | 90.000000  | 30.000000  | 60.000000  | 90.000000  | 30.000000  | -0.3365 | 0.1263   | 0.2598  | -0.0546  | 0.0216  | -0.7152  | 0.0233 | -0.3389 | -0.0244  | 0.0268  | 0.2601  |
| 8.150000                                                                                         | 90.000000  | 30.000000  | 60.000000  | 90.000000  | 30.000000  | -0.1965 | 0.0799   | 0.0271  | -0.0095  | 0.0017  | -0.2992  | 0.0028 | -0.1972 | -0.0019  | 0.0025  | 0.0272  |
| 6.300000                                                                                         | 90.000000  | 30.000000  | 90.000000  | 90.000000  | 30.000000  | 6.9883  | -1.5570  | 15.2261 | -4.1805  | 2.5673  | -5.7549  | 0.7484 | 7.0494  | -2.8197  | 2.7585  | 14.9550 |
| 6.700000                                                                                         | 90.000000  | 30.000000  | 90.000000  | 90.000000  | 30.000000  | 9.9377  | -0.2643  | 3.9999  | -0.8977  | 0.5299  | -2.7046  | 0.2660 | 0.9288  | -0.5641  | 0.5730  | 3.9836  |
| 7.500000                                                                                         | 90.000000  | 30.000000  | 90.000000  | 90.000000  | 30.000000  | -0.3590 | 0.1015   | 0.2597  | -0.0549  | 0.0216  | -0.7127  | 0.0233 | -0.3614 | -0.0245  | 0.0268  | 0.2600  |
| 8.500000                                                                                         | 90.000000  | 30.000000  | 90.000000  | 90.000000  | 30.000000  | -0.1481 | 0.0465   | 0.0080  | -0.0047  | 0.0005  | -0.1996  | 0.0009 | -0.1485 | -0.0004  | 0.0008  | 0.0080  |
| 3.600000                                                                                         | 125.593400 | 30.000000  | 180.000000 | 23.438600  | 240.000800 | 8.0748  | -17.2833 | 45.8215 | -21.5443 | 19.8588 | -22.4365 | 4.4074 | 8.8237  | -43.5116 | 42.7627 | 44.9333 |
| 4.000000                                                                                         | 125.593400 | 30.000000  | 180.000000 | 23.438600  | 240.000800 | -0.8681 | -5.7350  | 15.5731 | -6.5804  | 5.9734  | -11.8963 | 1.8435 | -0.8217 | -13.0546 | 13.0081 | 15.4588 |
| 5.200000                                                                                         | 125.593400 | 30.000000  | 180.000000 | 23.438600  | 240.000800 | -1.6621 | -0.1965  | 0.5540  | -0.2426  | 0.1349  | -2.0140  | 0.0958 | -1.6684 | -0.3489  | 0.3552  | 0.5542  |
| 4.505428                                                                                         | 125.593420 | 30.000000  | 180.000000 | 23.438603  | 240.000769 | -2.6471 | -1.3639  | 3.8849  | -1.5201  | 1.2382  | -5.4618  | 0.5568 | -2.6660 | -2.8433  | 2.8622  | 3.8782  |
| 5.900000                                                                                         | 125.593420 | 30.000000  | 180.000000 | 23.438603  | 240.000769 | -0.8259 | -0.0547  | 0.0738  | -0.0535  | 0.0135  | -0.8215  | 0.0150 | -0.8273 | -0.0388  | 0.0402  | 0.0740  |
| 3.300000                                                                                         | 152.736759 | 0.000000   | 0.000000   | 148.777353 | 90.000000  | 3.1195  | -12.3260 | 33.1041 | -16.5900 | 15.8189 | -20.4432 | 3.7660 | 3.3299  | -35.0298 | 34.8195 | 32.7306 |
| 4.016997                                                                                         | 152.736759 | 0.000000   | 0.000000   | 148.777353 | 90.000000  | -2.6561 | -1.1183  | 4.7116  | -2.0381  | 1.7260  | -6.7095  | 0.7144 | -2.7139 | -4.0074  | 4.0652  | 4.7057  |
| 5.300000                                                                                         | 152.736759 | 0.000000   | 0.000000   | 148.777353 | 90.000000  | -0.8307 | 0.2213   | 0.1289  | -0.0916  | 0.0280  | -1.1513  | 0.0271 | -0.8376 | -0.0789  | 0.0857  | 0.1293  |
| 3.650000                                                                                         | 152.736800 | 0.000000   | 0.000000   | 148.777400 | 90.000000  | -1.8165 | -4.2072  | 12.8453 | -5.8721  | 5.4250  | -11.7705 | 1.7087 | -1.8709 | -12.1192 | 12.1736 | 12.7920 |
| 4.600000                                                                                         | 152.736800 | 0.000000   | 0.000000   | 148.777400 | 90.000000  | -1.7998 | 0.1149   | 0.9380  | -0.4338  | 0.2734  | -2.8836  | 0.1671 | -1.8240 | -0.6989  | 0.7231  | 0.9377  |
| 4.600000                                                                                         | 171.783200 | 329.999800 | 90.000000  | 90.000000  | 200.424200 | 0.3931  | -5.4050  | 14.6724 | -4.8162  | 3.9945  | -9.2506  | 1.3382 | 0.5333  | -7.5751  | 7.4348  | 14.4466 |
| 5.600000                                                                                         | 171.783200 | 329.999800 | 90.000000  | 90.000000  | 200.424200 | -1.8263 | -0.6320  | 0.7393  | -0.2136  | 0.1116  | -1.9135  | 0.0952 | -1.8131 | -0.2365  | 0.2232  | 0.7395  |
| 4.200000                                                                                         | 171.783237 | 329.999823 | 90.000000  | 90.000000  | 200.424164 | 10.2968 | -15.3054 | 44.7454 | -17.9888 | 14.7366 | -17.9697 | 3.2215 | 11.4395 | -29.9008 | 28.7581 | 42.9060 |
| 4.980308                                                                                         | 171.783237 | 329.999823 | 90.000000  | 90.000000  | 200.424164 | -2.0992 | -2.1205  | 4.8401  | -1.3848  | 1.0609  | -4.9694  | 0.5184 | -2.0552 | -2.0247  | 1.9808  | 4.8146  |
| 6.200000                                                                                         | 171.783237 | 329.999823 | 90.000000  | 90.000000  | 200.424164 | -1.0520 | -0.3007  | 0.1135  | -0.0510  | 0.0122  | -0.8386  | 0.1668 | -1.0477 | -0.0308  | 0.0265  | 0.1137  |
| 4.600000                                                                                         | 171.783237 | 330.000000 | 270.000000 | 90.000000  | 200.424164 | -1.7681 | -3.8823  | 10.0161 | -3.0623  | 2.5685  | -8.4494  | 1.0944 | -1.7150 | -4.9570  | 4.9038  | 9.9454  |
| 4.980308                                                                                         | 171.783237 | 330.000000 | 270.000000 | 90.000000  | 200.424164 | -2.7701 | -1.5755  | 3.2499  | -0.9160  | 0.6787  | -4.5883  | 0.4081 | -2.7430 | -0.1369  | 1.3388  | 3.2436  |
| 6.200000                                                                                         | 171.783237 | 330.000000 | 270.000000 | 90.000000  | 200.424164 | -1.0370 | -0.2772  | 0.0734  | -0.0438  | 0.0082  | -0.8067  | 0.1028 | -1.0333 | -0.2633  | 0.0196  | 0.0734  |
| 3.840185                                                                                         | 180.000000 | 160.478555 | 0.000000   | 180.000000 | 130.478555 | -1.7886 | 0.1391   | 3.3306  | -1.1793  | 0.9690  | -5.5835  | 0.4750 | -1.8491 | -2.1497  | 2.2102  | 3.3344  |
| 3.840185                                                                                         | 180.000000 | 160.478555 | 0.000000   | 180.000000 | 130.478555 | -1.0042 | 0.6710   | 0.4696  | -0.1967  | 0.0977  | -2.1414  | 0.0767 | -1.0231 | -0.2362  | 0.2552  | 0.4695  |
| 3.500000                                                                                         | 180.000000 | 160.478600 | 0.000000   | 180.000000 | 130.478600 | -1.1490 | -1.6260  | 9.0135  | -3.4261  | 3.1643  | -9.5406  | 1.1640 | -1.2508 | -6.8021  | 6.9040  | 9.0095  |
| 5.000000                                                                                         | 180.000000 | 160.478600 | 0.000000   | 180.000000 | 130.478600 | -0.4822 | 0.5592   | 0.1018  | -0.0663  | 0.0153  | -1.1188  | 0.0184 | -0.4905 | -0.0355  | 0.0437  | 0.1017  |
| 4.250000                                                                                         | 180.000000 | 274.934400 | 115.066100 | 90.000000  | 330.000000 | 3.7898  | -9.8861  | 27.8388 | -10.2188 | 8.7726  | -14.9084 | 2.5441 | 4.1421  | -17.3986 | 17.0463 | 27.1482 |
| 4.500000                                                                                         | 180.000000 | 274.934400 | 115.066100 | 90.000000  | 330.000000 | -0.6367 | -5.2116  | 13.8908 | -4.5626  | 3.8567  | -9.9275  | 1.4336 | -0.5205 | -7.5213  | 7.4052  | 13.7041 |
| 5.500000                                                                                         | 180.000000 | 274.934400 | 115.066100 | 90.000000  | 330.000000 | -2.0504 | -0.6460  | 0.7023  | -0.2141  | 0.1067  | -2.0861  | 0.1020 | -2.0353 | -0.2437  | 0.2285  | 0.7024  |
| 5.000127                                                                                         | 180.000000 | 274.934400 | 115.066123 | 90.000000  | 330.000000 | -2.6985 | -1.5972  | 3.2343  | -0.9199  | 0.6703  | -4.4535  | 0.4040 | -2.6620 | -1.3630  | 1.3265  | 3.2239  |
| 6.000000                                                                                         | 180.000000 | 274.934400 | 115.066123 | 90.000000  | 330.000000 | -1.2796 | -0.3525  | 0.1452  | -0.0660  | 0.0164  | -1.0408  | 0.0241 | -1.2736 | -0.0442  | 0.0381  | 0.1455  |
| # The following points are used in fitting of both 'pot2' and 'pot3' and were not used in 'pot1' |            |            |            |            |            |         |          |         |          |         |          |        |         |          |         |         |
| 3.806669                                                                                         | 0.000000   | 0.000000   | 0.000000   | 0.000000   | 0.000000   | -1.7856 | 0.0412   | 3.6936  | -1.3086  | 1.0920  | -5.8886  | 0.5209 | -1.8496 | -2.4115  | 2.4755  | 3.6974  |
| 4.350000                                                                                         | 0.000000   | 0.000000   | 0.000000   | 90.000000  | 30.000000  | 1.6014  | -7.6428  | 21.1699 | -7.4186  | 6.3545  | -12.6819 | 2.0354 | 1.8165  | -12.4725 | 12.2575 | 20.7570 |
| 4.350000                                                                                         | 0.000000   | 24.691700  | 354.691500 | 90.000000  | 120.000000 | 3.6111  | -8.0348  | 23.4278 | -6.9145  | 5.9823  | -12.6780 | 1.9633 | 3.7460  | -10.6485 | 10.5136 | 23.2077 |
| 3.792801                                                                                         | 0.000000   | 30.000000  | 0.000000   | 0.000000   | 0.000000   | -1.7914 | 0.0020   | 3.8273  | -1.3611  | 1.1422  | -6.0066  | 0.5393 | -1.8569 | -2.5197  | 2.5852  | 3.8315  |
| 3.973084                                                                                         | 26.836784  | 120.000000 | 0.000000   | 31.123042  | 270.000000 | -2.6647 | -1.2911  | 5.2190  | -2.2589  | 1.9353  | -7.1111  | 0.7821 | -2.7249 | -4.4673  | 4.5275  | 5.2120  |
| 3.991842                                                                                         | 27.091851  | 120.000000 | 0.000000   | 32.025903  | 270.000000 | -2.6522 | -1.3074  | 5.1930  | -2.2542  | 1.9310  | -7.0566  | 0.7776 | -2.7165 | -4.4637  | 4.5281  | 5.1797  |
| 5.650000                                                                                         | 60.000000  | 30.000000  | 30.000000  | 90.000000  | 0.000000   | 0.5076  | -2.7287  | 8.7253  | -2.1974  | 1.8371  | -5.9411  | 0.7349 | 0.4302  | -2.8679  | 2.9453  | 8.6531  |
| 6.200000                                                                                         | 60.000000  | 30.000000  | 30.000000  | 90.000000  | 0.000000   | -1.1977 | -0.5278  | 1.6503  | -0.3567  | 0.2705  | -2.4163  | 0.1665 | -1.2135 | -0.4199  | 0.4357  | 1.6488  |
| 7.000000                                                                                         | 60.000000  | 30.000000  | 30.000000  | 90.000000  | 0.000000   | -0.6678 | -0.0435  | 0.1312  | -0.0315  | 0.0155  | -0.7566  | 0.0159 | -0.6691 | -0.0261  | 0.0273  | 0.1313  |
| 5.800000                                                                                         | 60.000000  | 30.000000  | 30.000000  | 120.000000 | 30.000000  | 2.6861  | -1.3733  | 8.7618  | -2.1505  | 1.6253  | -4.8198  | 0.6028 | 2.6462  | -2.2266  | 2.2664  | 8.6728  |
| 5.907655                                                                                         | 60.173287  | 300.000000 | 90.000000  | 90.000000  | 70.912901  | -1.7393 | -0.9953  | 2.3706  | -0.5462  | 0.4296  | -3.2749  | 0.2563 | -1.7599 | -0.7251  | 0.7456  | 2.3694  |
| 4.974668                                                                                         | 60.000000  | 90.000000  | 180.000000 | 0.000000   | 90.000000  | -2.6986 | -1.6868  | 3.4893  | -0.9958  | 0.7345  | -4.6348  | 0.4322 | -2.6613 | -1.4873  | 1.4501  | 3.4750  |
| 4.959671                                                                                         | 90.000000  | 100.900344 | 90.000000  | 8.594202   | 150.000000 | -2.7812 | -1.6260  | 3.4142  | -0.9566  | 0.7147  | -4.7264  | 0.4255 | -2.7547 | -1.4293  | 1.4027  | 3.4083  |
| 4.950043                                                                                         | 90.000000  | 101.284462 | 90.000000  | 9.140574   | 180.000000 | -2.7931 | -1.6572  | 3.4914  | -0.9805  | 0.7384  | -4.7968  | 0.4356 | -2.7691 | -1.4752  | 1.4512  | 3.4816  |
| 6.103850                                                                                         | 90.000000  | 120.000000 | 90.000000  | 90.000000  | 240.000000 | -1.7902 | -1.0747  | 2.5552  | -0.4593  | 0.3443  | -3.4393  | 0.2574 | -1.     |          |         |         |



S5 5.008800 90.000000 360.000000 90.000000 180.000000 120.000000 -2.4411 -1.4599 3.1254 -0.7500 0.5385 -4.2170 0.3435 -2.4195 -0.9889 0.9672 3.1215  
 S6 5.906800 90.000000 70.731000 270.000000 60.538700 120.000000 -1.7382 -1.0070 2.4092 -0.5529 0.4351 -3.3046 0.2598 -1.7604 -0.7324 0.7547 2.4043  
 S7 3.802900 0.000000 30.000000 0.000000 0.000000 0.000000 -1.7880 0.0332 3.7156 -1.3200 1.1029 -5.9135 0.5249 -1.8569 -2.4359 2.5047 3.7131  
 S8 3.815900 0.000000 0.000000 0.000000 0.000000 0.000000 -1.7817 0.0687 3.5946 -1.2724 1.0574 -5.8053 0.5082 -1.8488 -2.3378 2.4049 3.5924

# SAPT(DFT), MP2, CCSD, and CCSD(T) results for the characteristic points.

# SAPT --- SAPT(DFT) with third-order (total above)

# SAPT2 --- SAPT(DFT) up to second-order (total2 above)

# pot3 --- value from the pot3 fit

# pot2 --- value from the pot2 fit at the specified geometry (these are not characteristic points on the pot2 surface)

# CCSD(T) --- CCSD(T) interaction energy with aug-cc-pVTZ basis set with midbond. Dimer basis set used.

# MP2, SCF --- MP2, SCF interaction energies with the same basis set as above.

| #   | R        | beta_A     | gamma_A    | alpha_B    | beta_B     | gamma_B    | SAPT    | pot3    | pot3-SAPT | SAPT2   | pot2    | pot2-SAPT2 | CCSD(T) | MP2     | SCF    |
|-----|----------|------------|------------|------------|------------|------------|---------|---------|-----------|---------|---------|------------|---------|---------|--------|
| M1  | 3.936900 | 152.124100 | 30.000000  | 0.000000   | 152.124100 | 150.000000 | -2.6832 | -2.6862 | 0.0031    | -2.7511 | -2.7462 | -0.0049    | -2.6190 | -4.5022 | 3.7708 |
| M2  | 4.943600 | 9.222600   | 240.000000 | 270.000000 | 90.000000  | 101.750800 | -2.7951 | -2.7894 | -0.0058   | -2.7715 | -2.7638 | -0.0078    | -2.7515 | -3.6100 | 1.2666 |
| M3  | 6.103400 | 90.000000  | 120.000000 | 90.000000  | 90.000000  | 240.000000 | -1.7894 | -1.7962 | 0.0068    | -1.8165 | -1.8218 | 0.0053     | -1.7853 | -2.0603 | 1.1648 |
| S1  | 4.947900 | 90.000000  | 101.120300 | 270.000000 | 171.625600 | 330.000000 | -2.7812 | -2.7735 | -0.0077   | -2.7554 | -2.7453 | -0.0101    | -2.7397 | -3.5909 | 1.2444 |
| S2  | 3.959100 | 153.914400 | 300.000000 | 0.000000   | 149.554100 | 330.000000 | -2.6657 | -2.6662 | 0.0006    | -2.7314 | -2.7244 | -0.0070    | -2.6014 | -4.4493 | 3.7001 |
| S3  | 4.970500 | 0.000000   | 270.000000 | 180.000000 | 90.000000  | 90.000000  | -2.6982 | -2.7118 | 0.0136    | -2.6607 | -2.6741 | 0.0134     | -2.6401 | -3.4818 | 1.1666 |
| S3a | 4.842600 | 13.290200  | 180.000000 | 180.000000 | 105.780600 | 90.000000  | -2.7329 | -2.7185 | -0.0144   | -2.7107 | -2.6885 | -0.0221    | -2.6694 | -3.6230 | 1.4509 |
| S4  | 4.221000 | 135.279000 | 330.000000 | 180.000000 | 23.349300  | 60.000000  | -2.5914 | -2.6345 | 0.0430    | -2.6362 | -2.6767 | 0.0406     | -2.4740 | -4.0181 | 3.1338 |
| S5  | 5.008800 | 90.000000  | 360.000000 | 90.000000  | 180.000000 | 120.000000 | -2.4411 | -2.4514 | 0.0103    | -2.4195 | -2.4286 | 0.0092     | -2.3333 | -3.0698 | 1.3056 |
| S6  | 5.906800 | 90.000000  | 70.731000  | 270.000000 | 60.538700  | 120.000000 | -1.7382 | -1.7391 | 0.0009    | -1.7604 | -1.7633 | 0.0029     | -1.7470 | -2.0943 | 1.1001 |
| S7  | 3.802900 | 0.000000   | 30.000000  | 0.000000   | 0.000000   | 0.000000   | -1.7880 | -1.8039 | 0.0159    | -1.8569 | -1.8670 | 0.0101     | -1.5891 | -3.2678 | 4.2412 |
| S8  | 3.815900 | 0.000000   | 0.000000   | 0.000000   | 0.000000   | 0.000000   | -1.7817 | -1.7721 | -0.0096   | -1.8488 | -1.8366 | -0.0122    | -1.5933 | -3.2403 | 4.1394 |

#pot2 characteristic points and pot2 energy.

| #   | R        | beta_A     | gamma_A    | alpha_B    | beta_B     | gamma_B    | pot2    |
|-----|----------|------------|------------|------------|------------|------------|---------|
| M1  | 3.939444 | 151.695572 | 30.000000  | 0.000000   | 151.695572 | 30.000000  | -2.7470 |
| M2  | 4.949811 | 9.754128   | 240.000000 | 270.000000 | 90.000000  | 102.148241 | -2.7646 |
| M3  | 6.089739 | 90.000000  | 120.000000 | 90.000000  | 90.000000  | 240.000000 | -1.8225 |
| S1  | 4.954779 | 90.000033  | 101.480134 | 270.000000 | 171.182945 | 330.000000 | -2.7460 |
| S2  | 3.958399 | 153.601628 | 300.000000 | 0.000000   | 149.269719 | 330.000000 | -2.7250 |
| S3  | 4.980625 | 0.000000   | 270.000000 | 180.000000 | 90.000000  | 90.000000  | -2.6746 |
| S3a | 4.745264 | 17.611967  | 180.000000 | 180.000000 | 111.809229 | 90.000000  | -2.6933 |
| S4  | 4.342634 | 50.026295  | 330.000000 | 180.000000 | 156.713304 | 60.000000  | -2.6713 |
| S5  | 5.014794 | 90.000000  | 360.000000 | 90.000000  | 180.000000 | 120.000000 | -2.4288 |
| S6  | 5.890549 | 90.000000  | 70.718822  | 270.000000 | 60.128612  | 120.000000 | -1.7637 |
| S7  | 3.791276 | 0.000000   | 30.000000  | 0.000000   | 0.000000   | 0.000000   | -1.8676 |
| S8  | 3.803704 | 0.000000   | 30.000000  | 0.000000   | 0.000000   | 0.000000   | -1.8373 |

#-----characteristic points end -----
